1 Modulating glial genes involved in synaptic function mitigates pathogenesis and behavioral deficits in a  
2 *Drosophila* model of Huntington's Disease

3

4 Tarik S. Onur<sup>1,2,3,+</sup>, Andrew Laitman<sup>2,4,5,+</sup>, He Zhao<sup>2</sup>, Ryan Keyho<sup>2</sup>, Hyemin Kim<sup>2</sup>, Jennifer Wang<sup>2</sup>,  
5 Megan Mair<sup>1,2,3</sup>, Alma Perez<sup>2</sup>, Maria de Haro<sup>1,2</sup>, Huilan Wang<sup>6</sup>, Ying-Wooi Wan<sup>2</sup>, Genevera Allen<sup>2,7</sup>,  
6 Boxun Lu<sup>6</sup>, Ismael Al-Ramahi<sup>1,2</sup>, Zhandong Liu<sup>2,4,5</sup>, Juan Botas<sup>1,2,3,4,8\*</sup>

7

8 <sup>1</sup> Department of Molecular and Human Genetics, Baylor College of Medicine, Houston, Texas, USA

9 <sup>2</sup> Jan and Dan Duncan Neurological Research Institute at Texas Children's Hospital, Houston, Texas,  
10 USA

11 <sup>3</sup> Genetics & Genomics Graduate Program, Baylor College of Medicine, Houston, Texas, USA

12 <sup>4</sup> Quantitative & Computational Biosciences, Baylor College of Medicine, Houston, Texas, USA

13 <sup>5</sup> Department of Pediatrics, Baylor College of Medicine, Houston, Texas, USA

14 <sup>6</sup> State Key Laboratory of Medical Neurobiology and MOE Frontiers Center for Brain Science, School of  
15 Life Sciences, Fudan University, Shanghai, China

16 <sup>7</sup> Departments of Electrical and Computer Engineering, Statistics and Computer Science, Rice University,  
17 Houston, Texas, USA

18 <sup>8</sup> Lead Contact

19 \* Correspondence: [jbotas@bcm.edu](mailto:jbotas@bcm.edu)

20 + Co-first authors

21

22

23 **Abstract**

24

25 Most research on neurodegenerative diseases has focused on neurons, yet glia help form and maintain the

26 synapses whose loss is so prominent in these conditions. To investigate the contributions of glia to

27 Huntington's disease (HD), we studied transcriptomic changes in HD human, HD mice, and

28 *Drosophila* expressing human mutant *Huntingtin* (*mHTT*) in either glia, neurons or both. A large portion

29 of conserved genes are concordantly dysregulated across the three species; we tested these genes in a

30 high-throughput behavioral assay and found that downregulation of genes involved in synapse assembly

31 mitigated pathogenesis and behavioral deficits. To our surprise, mitigating glial pathogenesis by *dNRXN3*

32 knockdown was sufficient to improve the phenotype of flies expressing *mHTT* in neurons, suggesting that

33 *mHTT*'s toxic effects in glia ramify throughout the brain. This supports a model in which dampening

34 synaptic function is protective because it attenuates the excitotoxicity that characterizes HD.

35

36

37

38

39

40

## 41 **Introduction**

42  
43 Neurodegenerative conditions involve a complex cascade of events that takes many years to unfold.  
44 Even in the case of inherited disorders due to mutation in a single gene, such as Huntington's Disease  
45 (HD), the downstream ramifications at the molecular level are astonishingly broad. Caused by a CAG  
46 repeat expansion in *Huntingtin* (*HTT*) (The Huntington's Disease Collaborative Research Group, 1993),  
47 HD pathology is prominent in the striatum and cortex, yet transcriptomic studies consistently reveal  
48 thousands of changes in gene expression across the brain and different neuronal cell types, involving  
49 pathways ranging from autophagy to vesicular trafficking (Saudou and Humbert, 2016). To disentangle  
50 changes that are pathogenic from those that represent the brain's effort to compensate for the disease, we  
51 recently integrated transcriptomics with *in silico* analysis and high-throughput *in vivo* screening using a  
52 *Drosophila* model of HD (Al-Ramahi et al., 2018). This study demonstrated that HD pathogenesis is  
53 driven by upregulation of genes involved in the actin cytoskeleton and inflammation, but that neurons  
54 compensate by downregulating the expression of genes involved in synaptic biology and calcium  
55 signaling.

56 The finding that synaptic changes were protective caught our attention, because HTT itself is  
57 necessary for normal synaptogenesis and maintenance within the cortico-striatal circuit (McKinstry et al.,  
58 2014), largely through its role in retrograde axonal trafficking of neurotrophic factors (Saudou and  
59 Humbert, 2016). But synapses involve more than just neurons: glial cells also contribute to synapse  
60 formation, function, and elimination (Filipello et al., 2018; McKinstry et al., 2014; Oceau et al., 2018;  
61 Stogsdill et al., 2017). There is, in fact, emerging evidence that various glial subtypes affect outcomes in  
62 HD. The accumulation of mHTT in astrocytes and oligodendrocytes hinders their development and  
63 function and contributes to disease pathophysiology (Benraiss et al., 2016; Ferrari Bardile et al., 2019;  
64 Osipovitch et al., 2019; Wood et al., 2018). Conversely, healthy glia can improve the disease phenotype  
65 in HD mice (Benraiss et al., 2016). Recent studies using single-cell sequencing in astrocytes isolated from  
66 post-mortem tissue from HD patients and mouse models of HD (Al-Dalahmah et al., 2020; Diaz-Castro et  
67 al., 2019) developed molecular profiles that distinguish HD-affected astrocytes from astrocytes found in  
68 healthy brain tissue, but the physiological consequences of the gene expression changes were unclear.  
69 Whether mHTT affects glial participation in synapse formation or maintenance remains unknown, but  
70 then, we are only just now beginning to understand the range of glial types and their functions (Bayraktar  
71 et al., 2020; Darmanis et al., 2015).

72 The combination of synaptic degeneration in HD and the fact that both HTT and glia contribute to  
73 synaptic formation and maintenance led us to further investigate the influence of *mHTT* in glia. Because  
74 *Drosophila* have been used to elucidate glial biology (Freeman and Doherty, 2006; Olsen and Feany,  
75 2019; Pearce et al., 2015; Ziegenfuss et al., 2012) and are a tractable model system for studying HD and

76 other neurodegenerative diseases (Al-Ramahi et al., 2018; Bondar et al., 2018; Donnelly et al., 2020;  
77 Fernandez-Funez et al., 2000; Filimonenko et al., 2010; Goodman et al., 2019; Ochaba et al., 2014; Olsen  
78 and Feany, 2019; O'Rourke et al., 2013; Rousseaux et al., 2018; Yuva-Aydemir et al., 2018), we decided  
79 to generate flies that express *mHTT* solely in glia so that we could compare their transcriptomic signature  
80 with that of flies expressing *mHTT* in neurons. We took an unbiased approach, first establishing the  
81 repertoire of evolutionarily conserved genes that show concordant expression changes across HD human  
82 and mouse striata and HD fly brains. We then integrated this comparative transcriptomic data with high-  
83 throughput *in vivo* behavioral screening to acquire insight into glial contributions to HD pathogenesis and  
84 identify disease-modifying targets that mitigate the HD phenotype.

85

## 86 **Results**

### 87 *The HD transcriptome is conserved among evolutionarily distant model systems*

88 To study the contributions of neurons and glia to HD pathogenesis, we first needed to define a  
89 transcriptomic signature that would enable us to move across species (human, mouse, and fly) (Figure  
90 1A). We began with human tissue. Since the striatum is the brain region most prominently affected in  
91 HD, we compared the gene expression profiles of human post-mortem striatal samples from healthy  
92 individuals and patients with HD, from different stages of the disease (i.e., Vonsattel Grade 0-4) (Hodges  
93 et al., 2006; Vonsattel et al., 1985). We identified 1,852 downregulated and 1,941 upregulated  
94 differentially expressed genes (DEGs) in patients with HD compared to healthy individuals (Figure 1B).

95 We then reanalyzed published RNA-seq data from mouse striata, using an allelic series of knock-in  
96 mouse models with varying CAG-repeat lengths at six months of age (Langfelder et al., 2016). Because it  
97 is unclear which CAG tract length in mice most faithfully recapitulates HD pathogenesis, the triplet repeat  
98 length was treated as a continuous trait, and we narrowed our analysis to DEGs that correlate with  
99 increasing CAG repeat length. Comparing the striata of wild-type mice to the knock-in HD mouse  
100 models, there were 3,575 downregulated and 3,634 upregulated DEGs (Figure 1B). (The greater genome  
101 coverage provided by RNA-seq (Miller et al., 2014) yielded larger datasets for mouse and, below, for  
102 *Drosophila* than for humans.)

103 We performed RNA-seq leveraging *Drosophila* HD models (Kaltenbach et al., 2007; Romero et al.,  
104 2008) (see Methods) to compare the effect of expressing *mHTT* in either neurons or glia. The binary  
105 GAL4-*UAS* system was used to drive the expression of human *mHTT* either in neurons (*elav*>*GAL4*) or  
106 glia (*repo*>*GAL4*). Both full-length (*HTT*<sup>FLQ200</sup>) and N-terminal (*HTT*<sup>NT231Q128</sup>) models were used in this  
107 set of experiments, since both the full protein and N-terminal HD fragments accumulate in the human  
108 brain as a result of proteolysis and mis-splicing (Kim et al., 2001; Neueder et al., 2017; Sathasivam et al.,  
109 2013; Wellington et al., 2002). Principle component analysis (PCA) showed that the greatest differences

110 between samples are attributable to the cell-specific drivers, and not to the use of N-terminal vs. full-  
111 length protein (Figure S1). Expressing *mHTT* in neurons resulted in 3,058 downregulated and 2,979  
112 upregulated DEGs, while expressing *mHTT* in glia resulted in 3,127 downregulated and 3,159  
113 upregulated DEGs. There were also DEGs common to both neurons and glia expressing *mHTT*: 1,293  
114 downregulated and 1,181 upregulated (Figure 1B).

115 With these transcriptomic signatures in hand, we were able to compare gene expression profiles  
116 across the three species. We focused on genes with significantly altered expression (using a FDR<0.05;  
117 see Methods) in the same direction (i.e., upregulated or downregulated) in response to *mHTT* expression  
118 across these three species, including both *Drosophila* HD models. We call genes that meet this criterion  
119 concordantly altered DEGs (Table S1).

120 We compared DEGs using a graph-based approach (see Methods) that allows for evolutionary  
121 divergence and convergence, instead of imposing one-to-one relationships. 815 upregulated DEGs  
122 observed in HD patient-derived striatal tissue had an orthologous gene in the HD mouse model and at  
123 least one *Drosophila* model of HD that was concordantly upregulated. Similarly, 791 DEGs identified in  
124 HD patients had an orthologous gene in mouse and *Drosophila* models that was concordantly  
125 downregulated (Figure 1C). About 40% of the alterations in gene expression in patient striatal samples are  
126 concordant with orthologous genes in both *Drosophila* and mice models of HD. To determine whether  
127 this result could be an artifact of overlapping a large number DEGs in each model, we randomly selected  
128 and overlapped 815 and 791 orthologous genes across the three species 20,000 times. Based on the  
129 resulting distribution, we concluded that the overlap of concordant, orthologous DEGs across the various  
130 HD models was not random ( $p=6.37 \times 10^{-158}$  and  $p=1.66 \times 10^{-165}$ , Probability Distribution Test).

131 To compare the consequence of expressing *mHTT* in glia versus neurons, we recalculated the  
132 overlaps between the three species, distinguishing DEGs from the neuron-only and glia-only *HTT*-  
133 expressing *Drosophila*. There were 425 concordantly upregulated and 545 concordantly downregulated  
134 DEGs in glia. We also found 522 upregulated DEGs and 453 downregulated specific to neurons. Out of  
135 these groups of DEGs, 310 were upregulated and 320 were downregulated in both neurons and glia. To  
136 acknowledge the proportion of transcriptional alterations we excluded by specifying concordant  
137 expression with the HD *Drosophila* models, we also calculated the overlap between concordant DEGs  
138 observed only in striata from HD patients and mice. We found that 83.7% of upregulated DEGs and  
139 77.7% of downregulated DEGs that were altered concordantly in human and mouse HD striata were also  
140 concordantly altered in the brains of the neuronal and/or glial HD *Drosophila* models (Figure 1D). Of the  
141 genes that showed concordantly altered expression only in human and mouse striata, 64 (40%) of the  
142 upregulated and 68 (30%) of the downregulated DEGs did not have an ortholog in *Drosophila*.

143

144 *Network analysis identifies biological processes disrupted by mHTT toxicity in glia*

145 To investigate the cellular pathophysiology represented by DEGs in neurons and glia, we  
146 constructed protein-protein interaction (PPI) networks using the STRING-db database (Szklarczyk et al.,  
147 2015). The upregulated and downregulated networks of DEGs responding to *mHTT* expression in neurons  
148 or glia had a significant PPI enrichment compared to networks constructed from an equivalent number of  
149 random genes selected from a whole-proteome background (Table S2A). To control for potential artifacts  
150 that could arise from using the whole proteome background, we performed a more stringent analysis  
151 using only proteins that are found in the striatum (Al-Ramahi et al., 2018). Using average node degree  
152 and betweenness as proxies for connectivity, we found that the glial and neuronal networks show higher  
153 network connectivity than expected by random chance among proteins present in the striatum (Table  
154 S2B).

155 This high connectivity suggested that the networks are enriched in specific biological processes  
156 and/or pathways. We therefore clustered the glial *mHTT* response and neuronal *mHTT* response networks  
157 using the InfoMap random walks algorithm (iGraph Package for R and Python) (Rosvall and Bergstrom,  
158 2007). Clusters that had fewer than four nodes were filtered out of subsequent analysis. The glial  
159 networks formed 23 and 24 clusters for upregulated and downregulated DEGs, respectively. Both the  
160 upregulated and downregulated neuronal networks formed 29 clusters. We applied this clustering method  
161 to the networks of randomly selected striatal proteins in order to determine the expected number of  
162 clusters for networks of a similar size. Both the glial and neuronal networks formed significantly more  
163 clusters than would be expected from random selection (Table S2B).

164 To gain insight into biological processes represented by each cluster, we queried the five most  
165 significantly enriched terms (FDR<0.05) using the GO Biological Process and Kyoto Encyclopedia of  
166 Genes and Genomes (KEGG) terms within each cluster (Table S3). A synthesis of these terms was used  
167 to identify clusters in both the glial and neuronal networks (Table S3, Figures S2B and S2C). We  
168 compared the membership within clusters across the glial and neuronal networks using a pair-wise  
169 hypergeometric test and identified fourteen clusters of upregulated DEGs common to both glial and  
170 neuronal networks. Similarly, there were fifteen clusters of downregulated DEGs common to the both  
171 networks (Figure S2A).

172 Given the aims of our study, the clusters of DEGs specific to glia (represented by nodes in Figure 2)  
173 were of particular interest to us. Six clusters were specifically upregulated in response to *mHTT*  
174 expression, enriched in genes involved in transcription and chromatin remodeling, amino acid  
175 metabolism, cell proliferation, cytokine signaling/innate immunity, arachidonic acid metabolism, and  
176 steroid synthesis (Figure 2A). Six clusters were downregulated in response to glial *mHTT* expression,  
177 containing genes involved in synapse assembly, calcium ion transport, immune system regulation,

178 phagocytosis, mRNA processing, and fatty acid degradation (Figure 2B).

179 We applied the same network analysis to genes that had concordantly altered expression in HD  
180 patient striata and HD mouse model striata but not in HD *Drosophila* models (Figure S3A). We observed  
181 that clusters comprising DEGs specific to the HD patients and the mouse models were functionally  
182 related to DEGs in both the glial and neuronal networks (Figure S3B).

183

#### 184 *Distinguishing glia-specific gene expression alterations from bulk tissue profiles*

185 Gene expression data from bulk tissue does not provide the resolution required to define cell-  
186 autonomous gene expression alterations resulting from mHTT toxicity. Therefore, we compared DEGs  
187 (FDR<0.1) in human embryonic stem cells from individuals with HD (carrying 40-48 CAG repeats) with  
188 healthy embryonic stem cells that have been differentiated into either CD140+ oligodendrocyte  
189 progenitor cells (OPCs) or CD44+ astrocyte progenitor cells (APCs) (Osipovitch et al., 2019). We  
190 compared the resulting list of DEGs identified in the HD OPCs (1,439 genes) and HD APCs (193 genes)  
191 to the list of conserved HD DEGs from flies expressing *mHTT* in glia.

192 We identified 46 upregulated and 91 downregulated DEGs in common (Figure 3A). Astrocyte  
193 progenitor cells had 4 upregulated and 12 downregulated genes in common. We next asked whether any  
194 clusters in the fly glial networks were enriched in genes dysregulated in HD OPCs or APCs. The Synapse  
195 Assembly cluster (Figure 2B) was significantly enriched in genes with reduced expression in HD OPCs  
196 (Fisher's Exact Test,  $p < 0.001$ ), including *SYT13*, *LRRTM1*, *GRM1*, *EPB41L2*, *DLGAP3*, and *AGAP2*; the  
197 only gene of this cluster that was upregulated in HD OPCs was *NRXN3* (Figure 3B and 3C).

198 In sum, by using a comparative, network-based analysis of the HD transcriptome we associated  
199 dysregulation of several biological processes with the expression of *mHTT* in glia. Layering the gene  
200 expression profile of homogenous glial populations affected by mHTT onto these networks, we were able  
201 to extract from the bulk-tissue analysis a cluster of genes related to synaptic assembly that are altered in  
202 response to glial mHTT toxicity.

203

#### 204 *Downregulation of synapse assembly genes is compensatory in HD*

205 The next question we sought to answer is whether changes in expression of synaptic assembly  
206 genes are compensatory or pathogenic. We reasoned that if lowering the expression of a downregulated  
207 HD DEG aggravated mHTT-induced toxicity, then the downregulation of that gene is pathogenic.  
208 Conversely, if reducing the expression of a DEG led to an improvement in HD-related phenotypes, we  
209 considered that reduction to be compensatory. We previously used this approach, which takes advantage  
210 of the genetic tractability of *Drosophila* and the availability of high-throughput behavioral screening as a  
211 proxy for neurological function, to discover modifier genes that reduce HTT protein levels in HD patient

212 cells (Al-Ramahi et al., 2018). Here we assessed the effect of various genetic changes in the same group  
213 of animals over time, following the expression of mHTT in either glia, neurons, or both cell types. We  
214 used a custom, robotic assay system which video-records flies climbing upwards to the top of a vial after  
215 being knocked to the bottom (negative geotaxis) to track the behavior of individual *Drosophila* in real  
216 time and measure several motor metrics including speed (see Methods). Healthy flies reliably climb to the  
217 top at a steady rate until the effects of aging gradually reduce their speed. In contrast, animals expressing  
218 mHTT specifically in glia or neurons show much more rapid, if still age-dependent, loss of climbing  
219 speed compared to animals expressing a non-targeting hairpin RNA (hpRNA). While we only focus on  
220 the effect of these genetic perturbations on speed, we also observe impairments in coordination, balance,  
221 and direction (output as number of turns and stumbles) in *Drosophila* expressing mHTT (data not shown).

222 The expression of *SYT13*, *LRRTM1*, *GRM1*, *EPB41L2*, *DLGAP3*, and *AGAP2* is reduced in HD  
223 OPCs derived from human embryonic stem cells (Osipovitch et al., 2019), which is consistent with the  
224 expression patterns we observed in patient-derived striatal tissue, knock-in mouse model striatal tissue,  
225 and in neuronal tissue from *Drosophila* expressing mHTT in glia (Figure 3C). We performed genetic  
226 perturbation analysis on the *Drosophila* orthologs of these genes to assess whether their downregulation  
227 was pathogenic or compensatory in glia. Diminishing expression of the *Drosophila* orthologs of these six  
228 genes mitigated the behavioral deficits induced by mHTT expression in glia (Figure 3D, additional  
229 controls in Figure S4B). We concluded that reduced expression of these genes is a compensatory response  
230 to mHTT expression in glia.

231 There were additional protein interactors in Synapse Assembly whose expression was not altered in  
232 the HD-affected OPCs or APCs compared with controls but which were nonetheless downregulated  
233 across all three HD models. In our behavioral assay, reducing expression of these interactors, including  
234 *NLGN3*, *NLGN4X*, *HOMER1*, and *SLITRK5*, was also protective against glial mHTT toxicity (Figure  
235 S4A, Table S4; additional controls in Figure S4B).

236 In sum, comparative transcriptomic analysis indicated that genes within the Synapse Assembly  
237 cluster are associated with the glial response to HD, and the high-throughput behavioral assay further  
238 defined this response as compensatory.

239

240 *Decreasing Neurexin expression in glia mitigates mHTT-induced pathogenesis in both neurons and glia*

241 *NRXN3* was identified as a DEG in both our cross-species comparative transcriptomic analysis and  
242 in the gene expression profile of the HD glial progenitor population. *NRXN3* expression was lower in the  
243 bulk HD transcriptome across species compared to their respective controls, but it was more highly  
244 expressed in the HD OPCs than in controls. This discordance between the bulk and single-cell type gene  
245 expression profiles might be a result of time-dependent changes in gene expression as neurons age, but it



246 prevented us from classifying the *NRXN3* expression changes as being compensatory or pathogenic. We  
247 were particularly interested in neurexins, including *NRXN3*, because they mediate contact between pre-  
248 and post-synaptic neurons (Ushkaryov et al., 1992; Zeng et al., 2007).

249 We therefore asked whether downregulation of *Drosophila NRXN3* (*dNRXN3*, also known as *nrx-1*)  
250 is damaging or protective when both neurons and glia express *mHTT*. In the *Drosophila* behavioral assay,  
251 heterozygous loss of *dNRXN3* function in animals expressing *mHTT* in both neurons and glia mitigated  
252 *mHTT* toxicity and improved behavior (Figure 4A, left panel). Reproducing this experiment with flies  
253 expressing *mHTT* only in glia yielded the same benefit (Figure 4A, middle panel). The obvious next  
254 question, given its canonical role in neuron-neuron contact, was whether *dNRXN3* heterozygosity would  
255 protect against *mHTT* pathogenesis in neurons. Interestingly, the answer was no (Figure 4A, right panel).  
256 Consistent with this, glia-specific knockdown of *dNRXN3* (using the *repo-GAL4* driver) mitigated *mHTT*  
257 toxicity in glia (Figure 4B, left panel), but neuron-specific knockdown (using the *elav-GAL4* driver) of  
258 *dNRXN3* did not mitigate *mHTT* toxicity in neurons (Figure 4B, right panel). In sum, reducing *dNRXN3*  
259 in both neurons and glia protects against glial pathogenesis—and the combination of neuronal and glial  
260 pathogenesis—but not neuronal pathogenesis. This implies that *mHTT* disrupts some aspect of glial-  
261 neuronal interaction that is driven by the glia, since lowering expression of *dNRXN3* in glia is necessary  
262 and sufficient to mitigate behavioral impairments caused by *mHTT*.

263 To investigate whether *Nrxn3* is expressed in astrocytes in the striatum of HD mice, we performed  
264 *in situ* hybridization in coronal sections of striatal tissue taken from a mouse model of HD (*Hdh<sup>zQ175/+</sup>*) to  
265 probe *Nrxn3* mRNA. *Nrxn3* was expressed in striatal astrocytes (Figure 4C and 4D). In conclusion,  
266 modulating the expression genes other than *mHTT* in glia could be an effective strategy for ameliorating  
267 HD-induced CNS dysfunction.

268  
269 *Reducing SERPINA1 function mitigates behavioral impairments in neurons and glia, and lowers mHTT*  
270 *protein levels*

271 We were curious to identify modifiers that concordantly affect *mHTT*-induced pathogenesis in  
272 both neurons and glia, as these might be particularly attractive therapeutic targets for HD. We were  
273 particularly interested to discover whether any such shared modifiers exert their effect by reducing *mHTT*  
274 levels, which is considered a promising approach to therapy (Al-Ramahi et al., 2018; Barker et al., 2020;  
275 Caron et al., 2020; Li et al., 2019; Tabrizi et al., 2019; Wang et al., 2014; Wood et al., 2018; Yamamoto  
276 et al., 2000; Yao et al., 2015). We therefore again integrated network analysis with high-throughput  
277 experimentation.

278 Genes were sampled from both the neuronal and glial *mHTT* response networks by prioritizing  
279 those candidates with high centrality (calculated as a cumulative rank-score of node betweenness and

280 node degree) within each cluster. When available, we used alleles that perturb the expression or activity  
281 of the *Drosophila* orthologs in the same direction as the gene expression change in the HD patient  
282 population (Figure 5A). We screened 411 alleles, representing 248 *Drosophila* genes homologous to 211  
283 human genes, for perturbations that improve the age-dependent behavior of *Drosophila* expressing mHTT  
284 in neurons or glia (Table S5). Alleles that ameliorated neuronal or glial function were verified in a  
285 subsequent trial in animals expressing mHTT across the CNS (in both neurons and glia). In all, we  
286 identified 25 genes with altered expression in HD that suppressed mHTT-induced behavioral deficits in  
287 neurons, glia, or both (Figure 5B and 5C, Figure S5A, Table S6).

288 In a secondary screen, we tested whether these disease modifiers common to both neurons and glia  
289 exerted their beneficial effects by lowering levels of the mutant HTT protein. We collected protein lysates  
290 from *Drosophila* expressing mHTT across the CNS that also bore alleles that suppressed mHTT-induced  
291 behavioral deficits in both neurons and glia. We assessed the quantity of mHTT protein in these lysates by  
292 western blot, comparing experimental (candidate modifiers) and control animals (carrying a non-targeting  
293 hpRNA). This secondary screen identified *Spn42De* as a modifier whose knockdown lowered mHTT  
294 levels. *Spn42De* is one of the four *Drosophila* homologues of human *SERPINA1* (which encodes alpha-1-  
295 antitrypsin, a member of a large group of protease inhibitors). *Spn42De*, human *SERPINA1* and mouse  
296 *Serpina1* are all upregulated in HD and they are part of the Wound Healing and Inflammation cluster in  
297 both the neuronal and glial mHTT response networks (Figure S2C). Knockdown of *Spn42De* (henceforth  
298 *dSERPINA1*) in *Drosophila* expressing mHTT in both neurons and glia mitigated behavioral impairments  
299 (Figure 6A). In independent immunoblots, *dSERPINA1* knockdown consistently reduced mHTT protein  
300 levels in lysates extracted from the heads *Drosophila* expressing mHTT in both neurons and glia (Figure  
301 6B and 6C). As a control, we performed immunoblot analysis of lysates from a green fluorescent protein  
302 (GFP) reporter line to ensure that this allele of *dSERPINA1* did not reduce the function of the *GAL4-UAS*  
303 system (Figure S6).

304 To validate this observation across model systems we performed homogenous time-resolved  
305 fluorescence (HTRF) on *Hdh<sup>Q111/Q7</sup>* mouse striatal cell lysates that were treated with either a pool of non-  
306 targeting scramble siRNAs, a pool of siRNAs against *Htt*, or a pool of siRNAs against *Serpina1a* (the  
307 murine ortholog of *SERPINA1*). *Serpina1a* knockdown significantly reduced mHTT signal (Figure 6D).  
308 Knockdown of *SERPINA1* thus protected against mHTT toxicity in neurons and glia by reducing levels of  
309 mutant HTT. Verifying this effect in multiple model organisms increases confidence in this observation  
310 and suggests that *SERPINA1* could potentially prove useful as a target for treating HD. Interestingly,  
311 *SERPINA1* expression is low in the healthy brain but it is upregulated in several disease conditions,  
312 consistent with a potential role in neuroinflammation (Abu-Rumeileh et al., 2020; Cabezas-Llobet et al.,  
313 2018; Gollin et al., 1992; Peng et al., 2015), and we previously showed that other genes in the subnetwork

314 implicated in neuroinflammation can be manipulated to lower mHTT protein levels (Al-Ramahi et al.,  
315 2018). *SERPINA1* may thus warrant investigation as a target for other neurological disorders as well.

316

## 317 **Discussion**

318 We found a high degree of overlap of differentially expressed genes (DEGs) across tissues from  
319 human HD brains, brains of HD mice, and flies that express *mHTT* in glia. This observation is consistent  
320 with previous evidence that *Drosophila* glia perform many of the same functions as mammalian  
321 astrocytes, oligodendrocytes, and microglia (Chung et al., 2020; Freeman and Doherty, 2006; Ziegenfuss  
322 et al., 2012). Several studies have also shown that wild-type glial cells ameliorate disease when  
323 transplanted into HD mice, and mHTT exerts a deleterious effect on glial development and function,  
324 which in turn influences HD pathogenesis (Benraiss et al., 2016; Bradford et al., 2009; Garcia et al., 2019;  
325 Huang et al., 2015; Osipovitch et al., 2019). More recently, it was discovered that transcription factors  
326 involved in glial differentiation and myelin synthesis are downregulated in glial progenitor cells  
327 (Osipovitch et al., 2019). Yet despite this progress, the overall contributions of glial genes to synaptic  
328 impairments and other key neurodegenerative pathologies remain poorly understood. The genetic  
329 malleability of *Drosophila* enabled us to thoroughly examine the neuron-glia interface from both the glial  
330 and the neuronal directions.

331 Synaptic dysfunction is a common theme among many neurodegenerative disorders (McInnes et  
332 al., 2018; Phan et al., 2017; Prots et al., 2018). While it is clear that the dysfunction of the glia-synapse  
333 interface is central to the pathophysiology of neurodegeneration (Filipello et al., 2018; Garcia et al., 2019;  
334 Lian et al., 2015; Litvinchuk et al., 2018), the underlying mechanisms remain underexplored relative to  
335 the interactions between pre- and post-synaptic neurons. Our results support the observation that the  
336 expression of *mHTT* in glia is sufficient to drive synaptic dysfunction (Wood et al., 2018). In HD,  
337 presynaptic motor neurons release elevated levels of glutamate into the synapse, driving medium spiny  
338 neurons (MSNs) into excitotoxicity (Estrada Sánchez et al., 2008; Hong et al., 2016). Hyperactivity of  
339 receptors at the post-synaptic densities sensitizes MSNs to excitotoxicity, further contributing to  
340 neurodegeneration (Estrada Sánchez et al., 2008). Astrocytic *mHTT* expression may contribute to  
341 neuronal excitotoxicity by elevating levels of glutamate, potassium, and calcium at the synapse (Garcia et  
342 al., 2019; Jiang et al., 2016; Tong et al., 2014).

343 Modifiers of mHTT-induced pathogenesis identified in our study, such as metabotropic glutamate  
344 receptors and the scaffold protein HOMER1, regulate calcium and glutamate signaling in astrocytes  
345 (Buscemi et al., 2017; Spampinato et al., 2018). Reducing the expression of these genes could prevent  
346 excess calcium and glutamate from accumulating at the synapse. Indeed, we previously found that HD  
347 neurons downregulate the expression of genes involved in calcium signaling in an effort to compensate

348 for HD pathogenesis (Al-Ramahi et al., 2018). Glial calcium signaling can also influence neuronal  
349 activity, however, at the neuronal soma (Weiss et al., 2019). In *Drosophila*, cortical glia modulate  
350 neuronal activity through potassium buffering, a process that is regulated by calcium-mediated  
351 endocytosis of potassium channels (Weiss et al., 2019). Glia can also physically disrupt synapses in  
352 disease states: Förster resonance energy transmission (FRET) *in vivo* revealed that, in HD, the distances  
353 between astrocytes and pre-synaptic neurons are increased at the cortico-striatal circuit (Octeau et al.,  
354 2018). Thus, knocking down the genes in the Synapse Assembly cluster could reduce physical interaction  
355 between glia and synapses, promoting normal synaptic function.

356 If in HD synapses grow more fragile and fewer in number as the disease progresses, why would  
357 down-regulating the expression of glial genes required for synapse formation and function be protective?  
358 We postulate it is for the same reason that downregulating calcium-signaling genes is compensatory (Al-  
359 Ramahi et al., 2018): the brain is attempting to protect against the excitotoxicity described above. Mutant  
360 HTT disrupts neuronal development (Ring et al., 2015) and skews embryonic neurogenesis toward  
361 producing more neurons (Barnat et al., 2020); by the time HD mutations carriers reach the age of six  
362 years, they have greatly enlarged striata and functional hyperconnectivity to the cerebellum  
363 (Tereshchenko et al., 2020). The more hyperconnected, the more abrupt the loss of these connections, and  
364 the more rapid the striatal atrophy that follows (Tereshchenko et al., 2020). The hyperfunction of a given  
365 brain region puts considerable strain on the circuit, and it seems that over the course of a lifetime, the  
366 brain keeps trying to compensate for the abnormalities that arise at different stages of HD. The recent  
367 observation that deletion of astrocytic neurexin-1 $\alpha$  attenuates synaptic transmission but not synapse  
368 number supports this hypothesis (Trotter et al., 2020).

369 We do not think that the protection provided by modifiers in this cluster is limited to modulating  
370 neurotransmission. In astrocytes, calcium signaling also controls the activity of reactive astrocytes  
371 (Buscemi et al., 2017). Astrogliosis, or the proliferation of immune active astrocytes, is typically  
372 observed at later stages of HD (Al-Dalahmah et al., 2020; Buscemi et al., 2017). These immune-activated  
373 glia not only eliminate synapses (Liddelow et al., 2017; Sofroniew, 2009) but can also transmit mHTT  
374 aggregates through the synapse (Donnelly et al., 2020). In *Drosophila*, knockdown of *draper* prevents  
375 astrocytic phagocytosis and stops the spread of mHTT protein aggregates from pre-synaptic neurons to  
376 the post-synaptic compartment (Donnelly et al., 2020; Pearce et al., 2015). mHTT protein can also enter  
377 the synaptic space by endosomal/lysosomal secretion mediated by Syt7 (Trajkovic et al., 2017). In our  
378 present study, we observed that knockdown of synaptotagmins in *Drosophila* ameliorates glial mHTT-  
379 induced dysfunction. Thus, knocking down genes in the Synapse Assembly cluster could also benefit the  
380 circuit by reducing the transmission of aggregated mHTT protein from pre- to post-synaptic neurons.

381            Interestingly, loss-of-function variants in *NRXN1-3*, *NLGN1*, *NLGN3*, *DLGAP3* and *LRRTM1*  
382 have been associated with various disorders of synaptic dysfunction, including Autism Spectrum Disorder  
383 (ASD), schizophrenia, and obsessive compulsive disorder (OCD) (Nakanishi et al., 2017; Paris Autism  
384 Research International Sibpair Study et al., 2003; Südhof, 2008; Vaags et al., 2012; Wang et al., 2018;  
385 Windrem et al., 2017). We speculate that the consequences of loss of function of these genes depend on  
386 both dosage and context: modest reductions of gene expression can be protective in the context of HD  
387 pathogenesis, whereas a more severe loss of function results in ASD and OCD. Context could also relate  
388 to the affected cell-type. Future studies should investigate whether these loss of function variants  
389 associated with neurodevelopmental and psychiatric disorders alter the age of disease onset in patients  
390 with HD. It could be of particular interest to assess if these neurodevelopmental and psychiatric-  
391 associated variants prevent neurodevelopmental changes observed early in HD or blunt synaptic  
392 hyperactivity later in disease.

393

#### 394 **Acknowledgements**

395 We thank Vicky Brandt for critical input on the manuscript. We also thank Steve Goldman for sharing  
396 data cited in this work and his thoughtful insight. This work was supported by grants to J.B. from NIH/  
397 NIA (R01AG057339) and CHDI. B.L. is sponsored by Natural Science Foundation of China (31970747,  
398 31601105, 81870990, 81925012). T.O. and M.M. were supported by the NIGMS Ruth L. Kirschstein  
399 National Research Service Award (NRSA) Predoctoral Institutional Research Training Grant  
400 (T32 GM008307) provided to the Genetics & Genomics Graduate Program at Baylor College of  
401 Medicine. A.L. was supported by Baylor College of Medicine Medical Scientist Training Program and  
402 the NLM Training Program in Biomedical Informatics and Data Science (T15 LM007093) at the Gulf  
403 Coast Consortium. The High Throughput Behavioral Screening core at the Jan and Dan Duncan  
404 Neurological Research Institute was supported by generous philanthropy from the Hildebrand family  
405 foundation. This project was also supported by the RNA In Situ Hybridization Core facility at Baylor  
406 College of Medicine with the expert assistance of Cecilia Ljungberg, Ph.D., and funding from a Shared  
407 Instrumentation grant from the NIH (S10 OD016167) and the NIH IDDRC Grant U54 HD083092 from  
408 the Eunice Kennedy Shriver National Institute Of Child Health & Human Development. The content is  
409 solely the responsibility of the authors and does not necessarily represent the official views of the Eunice  
410 Kennedy Shriver National Institute of Child Health & Human Development or the National Institutes of  
411 Health.

412

#### 413 **Author Contributions**

414 J.B. conceived, supervised and provided resources for the study; Z.L. supervised bioinformatic studies;  
415 T.O., A.L., G.A., B.L., I.A.-R., Z.L. and J.B. contributed to experimental design; T.O., A.L., H.Z., R.K.,  
416 H.K., J.W., M.M., A.P., M.H., H.W. Y.-W.W. performed experiments; T.O. and J.B. wrote the paper.

417

418 **Declarations of Interest**

419 The authors declare no competing financial interests.

420

421  
422  
423

## Figures

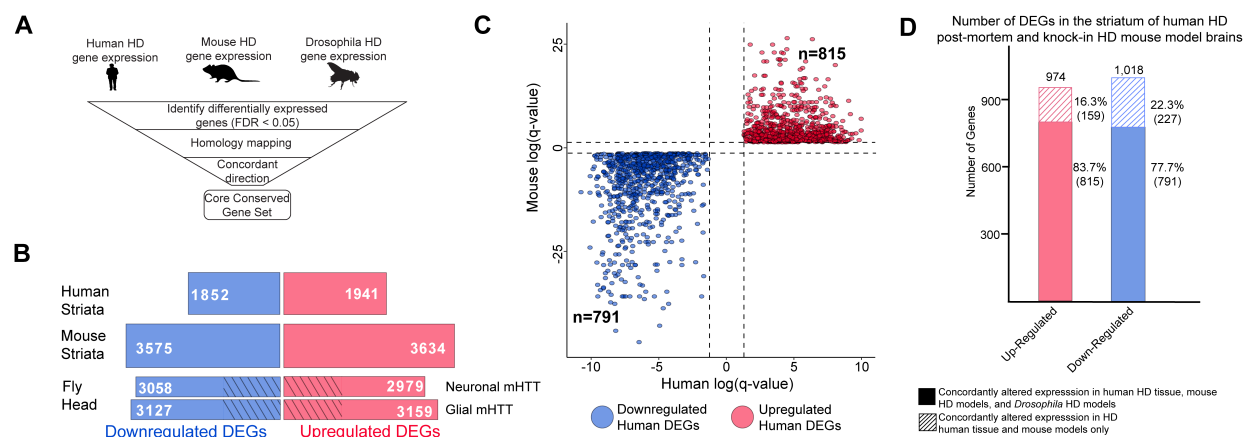

424  
425

426 **Figure 1. Differentially expressed genes (DEGs) in HD human striatal tissue are concordantly**  
427 **altered in mouse and *Drosophila* HD models.**

428 A) Our approach to identifying orthologous genes in tissues from humans, mice, and *Drosophila* with  
429 concordant expression changes (i.e., upregulated or downregulated in all three systems) following *mHTT*  
430 expression.

431 B) The number of differentially expressed genes (DEGs) in each species-specific dataset that are  
432 downregulated (blue) or upregulated (red) (see Methods). *Drosophila* DEGs were from flies expressing  
433 either the N-terminal (*HTT<sup>NT231Q128</sup>*) or full-length *mHTT* (*HTT<sup>FLQ200</sup>*) in neurons (*elav-GAL4*) or glia  
434 (*repo-GAL4*). The DEGs in flies are grouped according to the cell type expressing *mHTT*, rather than  
435 *mHTT* model. The cross-hatched regions of the *Drosophila* bars represent DEGs shared between the  
436 neuronal and glial sets: 1,293 downregulated genes and 1,181 upregulated genes.

437 C) Points in the scatterplot represent human DEGs identified by the strategy outlined in (A) that are  
438 concordantly dysregulated across all three species. Red nodes represent upregulated DEGs (n=815),  
439 whereas blue nodes represent downregulated genes (n=791). The overlap of these concordant DEGs  
440 represents approximately forty percent of genes with altered expression in the human HD transcriptome  
441 that are upregulated (p=6.37x10<sup>-158</sup>) or downregulated (p=1.66x10<sup>-165</sup>). The p-value was calculated using a  
442 random background probability distribution over 2x10<sup>5</sup> random samplings.

443 D) The stacked bar graph highlights that a large majority of concordant DEGs in human HD striata and  
444 knock-in HD mouse models are also concordantly altered in *Drosophila* models of HD.

445 **Related to Figure 1, Figure S1:** Expressing *mHTT* in *Drosophila* glia or neurons leads to distinct gene  
446 expression profiles. In contrast, the full-length and N-terminal models show relatively similar gene  
447 expression profiles.

448

**A Upregulated Glial mHTT Response Network**

**B Downregulated Glial mHTT Response Network**

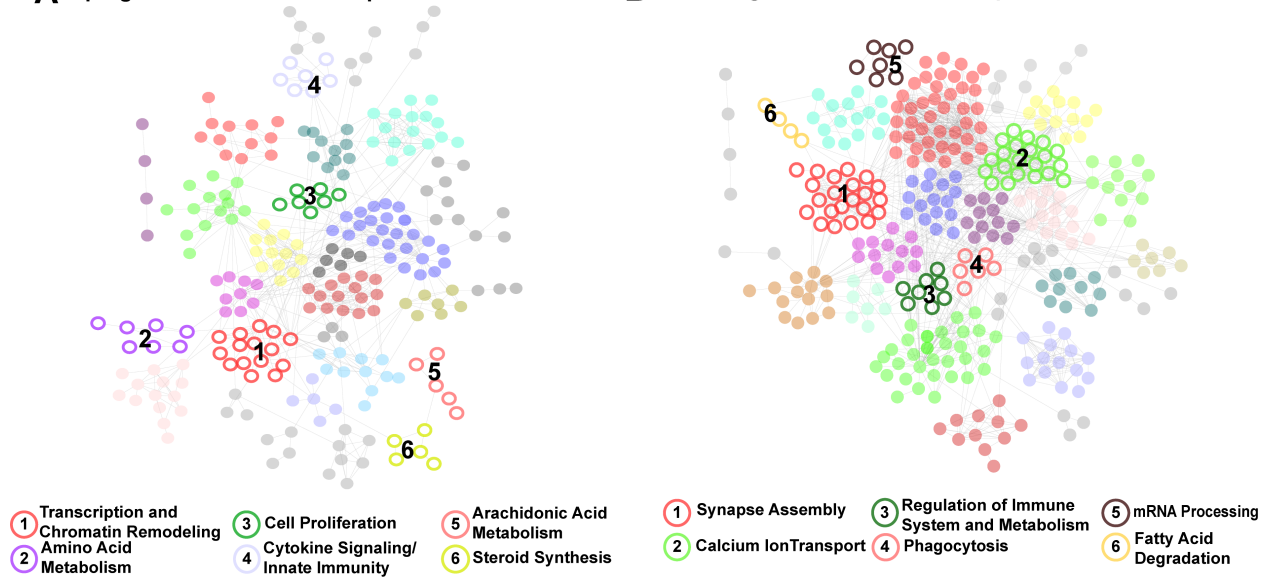



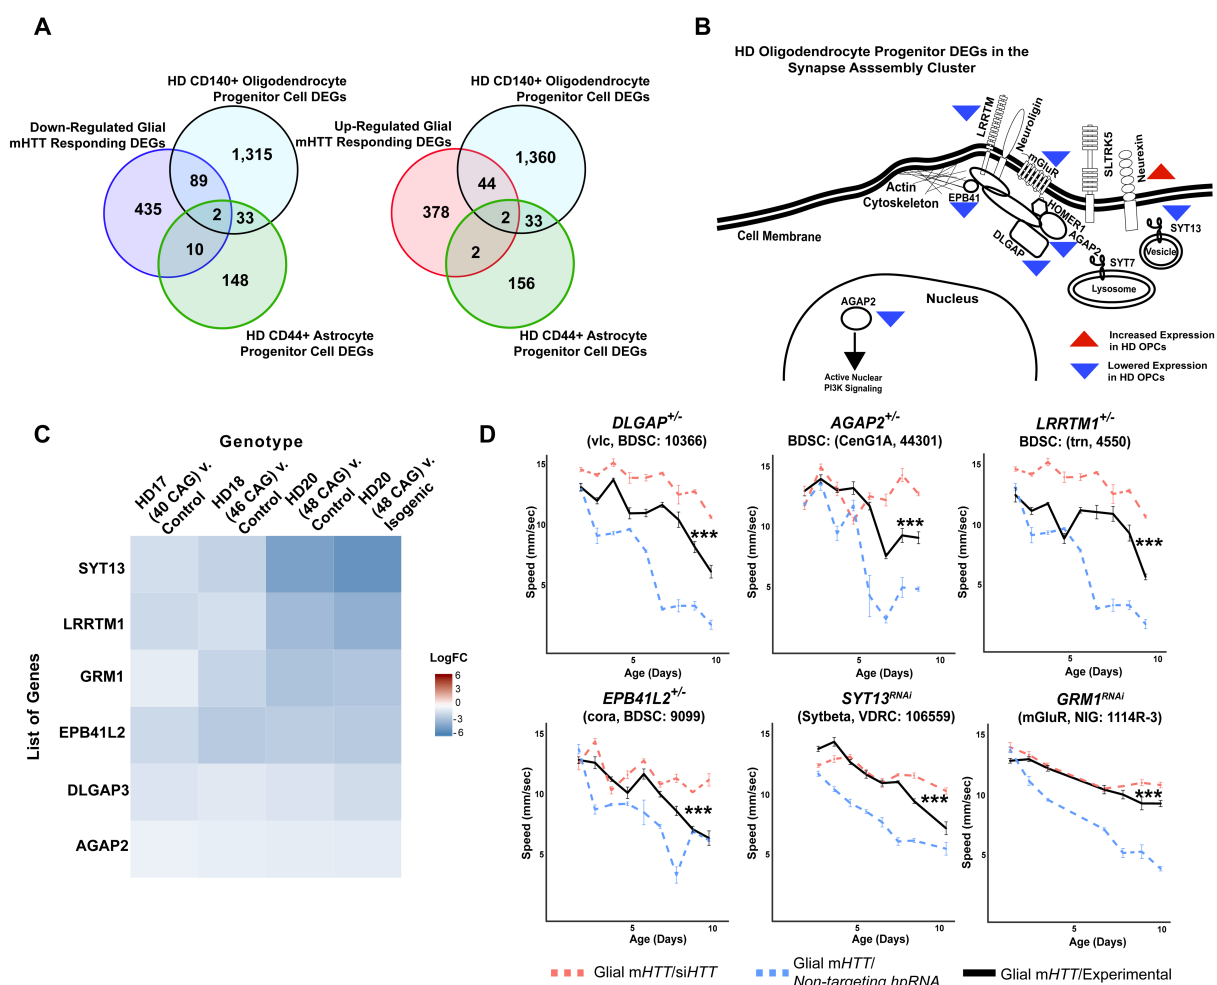

464

465 **Figure 3. Reducing the expression of Synapse Assembly cluster genes in glia mitigates mHTT-**  
 466 **induced behavioral impairments.**

467 A) Overlaps between concordant DEGs from the cross-species analysis defined as responding to mHTT  
 468 expression in glia and DEGs identified in HD human embryonic stem cells (hESCs) that have been  
 469 differentiated into either CD140+ oligodendrocyte progenitor cells (OPCs) or CD44+ astrocyte progenitor  
 470 cells (APCs) (Osipovitch et al. 2018).

471 B) Model placing Synapse Assembly cluster proteins into cellular context. The Synapse Assembly cluster  
 472 was significantly enriched for DEGs in HD OPCs (Fisher's Exact Test,  $p < 0.001$ ). Only one gene, *NRXN3*,  
 473 was upregulated in HD OPCs compared to controls (upward red triangle); the rest (*AGAP2*, *GRM1*,  
 474 *LRRTM1*, *EPB41L2*, *DLGAP3*, and *SYT13*) were downregulated (downward blue triangles).

475 C) Heatmap representing genes with lower expression in HD OPCs compared to controls (presented as  
 476 LogFC) that belong to the Synapse Assembly cluster. Each row is one downregulated gene; each column  
 477 is a different HD human embryonic stem cell line, with CAG repeat length ranging from 40-48, compared  
 478 to respective controls (Osipovitch et al 2018).

479 **Figure 3 continued.**

480 D) Behavioral assessment of fruit flies that express *mHTT* only in glia, after reducing the expression of  
481 the overlapping DEGs in HD OPCs and the Synapse Assembly cluster. Plots show climbing speed as a  
482 function of age. \*\*\*  $p < 0.001$  between positive control and experimental (by linear mixed effects model  
483 and post-hoc pairwise comparison (see Methods). Points and error bars on the plot represent the  
484 mean $\pm$ SEM of the speed for three technical replicates. Each genotype was tested with 4-6 replicates of 10  
485 animals. Modifying alleles in (D) are listed in the **Key Resources Table**. Additional climbing data for  
486 these genes can be found in **Figure S4A** and a summary of statistical analysis for this data can be found in  
487 **Table S4**. Control climbing data for these alleles can be found in **Figure S4B**.

488 *Drosophila* Genotypes: positive control ( $w^{1118}; UAS\text{- non-targeting } hpRNA/+; repo\text{-}GAL4, UAS\text{-}$   
489  $HTT^{NT231Q128}/+$ ), treatment control ( $w^{1118}; repo\text{-}GAL4, UAS\text{- } HTT^{NT231Q128}/UAS\text{-}siHTT$ ), and experimental  
490 ( $w^{1118}; repo\text{-}GAL4, UAS\text{- } HTT^{NT231Q128}/modifier$ ).

491

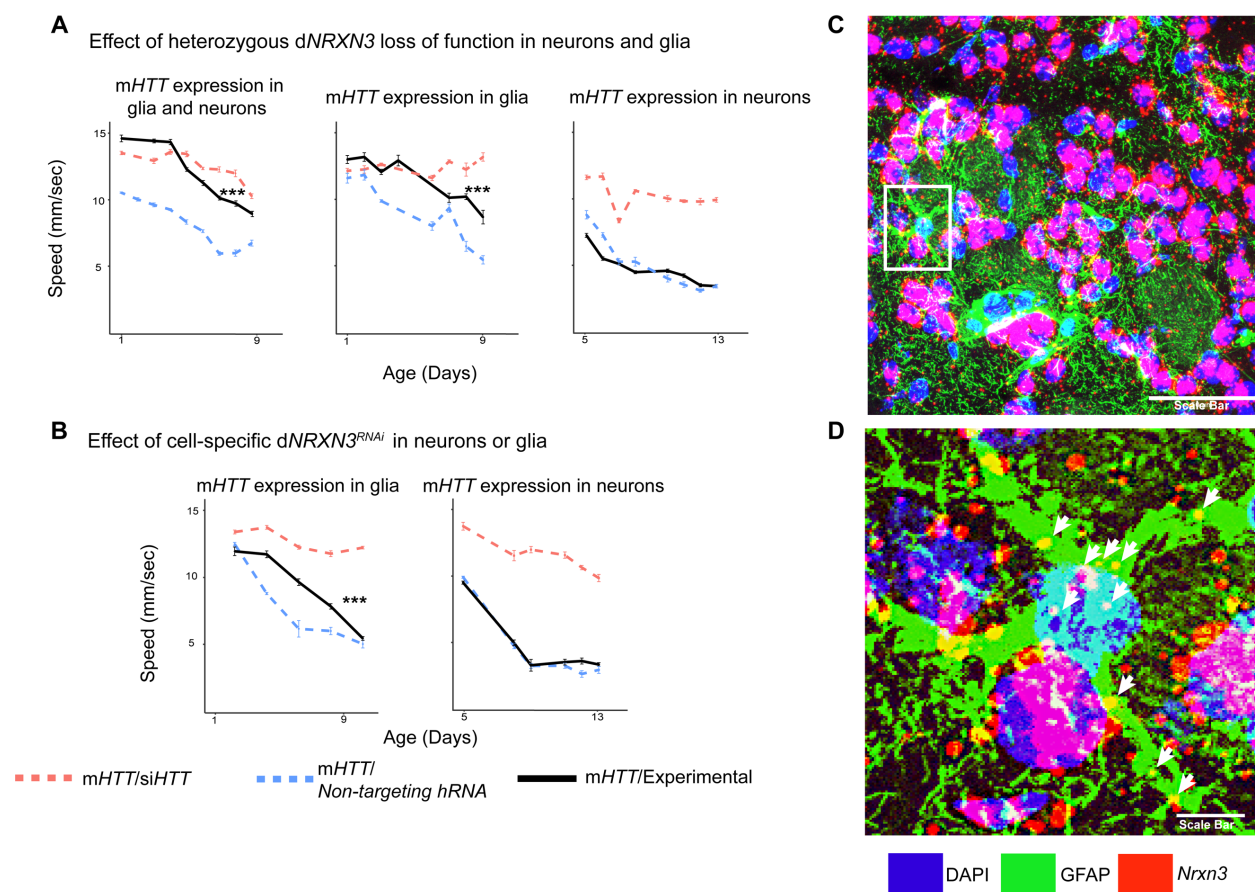

492

493 **Figure 4. Glia-specific *dNRXN3* knockdown mitigates impairments caused by *mHTT* expression.**

494 A) Behavioral assays (climbing speed as a function of age) showing that *dNRXN3* heterozygous loss-of-  
 495 function (LOF) ameliorates behavioral impairments caused by expression of *mHTT* in both neurons and  
 496 glia and in glia alone, but not in neurons alone.

497 B) Glia-specific *dNRXN3* knockdown mitigates behavioral impairments caused by *mHTT* expressed  
 498 solely in glia; however, neuron-specific knockdown of *dNRXN3* does not affect impairments induced by  
 499 *mHTT* expressed solely in neurons. \*\*\* <0.001 between positive control and experimental by linear  
 500 mixed effects model and post-hoc pairwise comparison (see **Methods**). Points and error bars on the plot  
 501 represent the mean±SEM of the speed for three technical replicates. Each genotype was tested with 4-6  
 502 replicates of 10 animals. A full summary of the statistical analysis for this data can be found in **Table S4**.  
 503 Control climbing data for these alleles can be found in **Figure S4B**.

504 C) Astrocytes in the striatum of 6-month old knock-in HD mice (*Hdh*<sup>Q175/+</sup>) expressing *Nrxn3*. *In situ*  
 505 probe for *Nrxn3* mRNA is in red (appears magenta when overlapping with the DAPI channel) astrocytes  
 506 are immunostained using an antibody specific for glial fibrillary acidic protein (GFAP) in green, and  
 507 DAPI in blue. Image was taken at 63x magnification using a Leica SP8 confocal microscope. Scale bar  
 508 (in white on the bottom right) represents 50 μm.

509 **Figure 4 continued.**

510 D) Magnified image of the astrocyte highlighted in the white box in (C). White arrows indicate yellow  
511 puncta where *Nrxn3* mRNA localizes to astrocytes. Scale bar (in white on the bottom right) represents 5  
512  $\mu\text{m}$ .

513 *Drosophila* Genotypes: *dNRXN3* loss-of-function allele ( $y^1 w^*$ ;  $Mi\{y^{+mDint2}=MIC\}nrx-I^{M102579}$  or  $nrx-I^{LOF}$ ,  
514 BDSC: 61696), *dNRXN3* RNAi allele ( $UAS-nrx-I^{hpRNA}$ , VDRC: 36326), neuronal and glial HD model  
515 with *dNRXN3* mutant ( $elav^{c155}-GAL4/y^1 w^*$ ;  $repo-GAL4,UAS-HTT^{NT231Q128}/Experimental\ allele$ ), glial HD  
516 model with *dNRXN3* mutant ( $w^{1118}/y^1 w^*$ ;  $repo-GAL4,UAS-HTT^{NT231Q128}/Experimental\ allele$ ), and  
517 neuronal model with *dNRXN3* mutant ( $elav^{c155}-GAL4/y^1 w^*$ ;  $UAS-HTT^{NT231Q128}/Experimental\ allele$ ).  
518

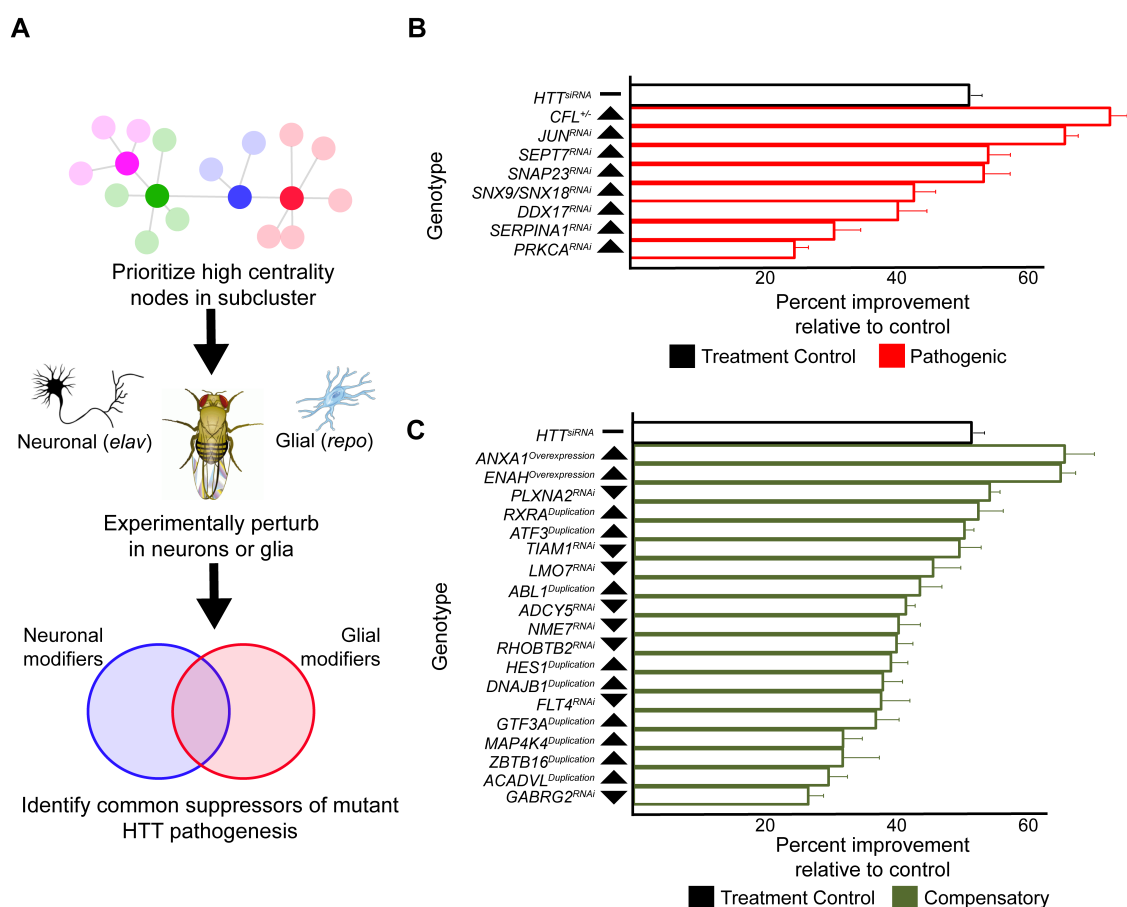

519

520 **Figure 5. Compensatory and pathogenic gene expression changes shared by neurons and glia in**

521 **response to mHTT expression.**

522 A) Our approach for identifying modifiers of mHTT-induced behavioral impairments common to both

523 neurons and glia. Genes that were central to their respective clusters were prioritized and manipulated in

524 *Drosophila* expressing mHTT ( $HTT^{NT231Q128}$ ) in either neurons (*elav-GAL4*) or glia (*repo-GAL4*).

525 B) Red bars represent the percent improvement in behavior over a 9-day trial, compared to positive

526 control (non-targeting hpRNA) in *Drosophila* expressing mHTT in neurons and glia, after we antagonized

527 pathogenic gene expression changes.

528 C) Green bars represent the percent improvement in behavior over a 9-day trial, compared to control (see

529 B), after we mimicked compensatory gene expression alterations.

530 In (B) and (C), the top black bars represent the effect of directly targeting the mHTT transgene using an

531 siRNA. Arrowheads indicate the direction of the conserved, concordant altered expression for each gene

532 as a result of mHTT expression in humans, mice and *Drosophila*. Behavioral assay graphs corresponding

533 to the data presented in (B) and (C) can be found in **Figure S5A**. Corresponding statistical analysis for

534

535

536 **Figure 5 continued.**

537 (B) and (C) can be found in **Table S6**. Corresponding controls for behavioral data can be found in **Figure**  
538 **S5B and C**.

539 *Drosophila* Genotypes: Positive control (*elav<sup>c155</sup>-GAL4/w<sup>1118</sup>; UAS- non-targeting hpRNA/+; repo-*  
540 *GAL4, UAS-HTT<sup>NT231Q128</sup>/+*), treatment control (*elav<sup>c155</sup>-GAL4/w<sup>1118</sup>; repo-GAL4, UAS- HTT<sup>NT231Q128</sup>/UAS-*  
541 *siHTT*) and experimental (*elav<sup>c155</sup>-GAL4/w<sup>1118</sup>; repo-GAL4, UAS- HTT<sup>NT231Q128</sup>/modifier*).

542

543

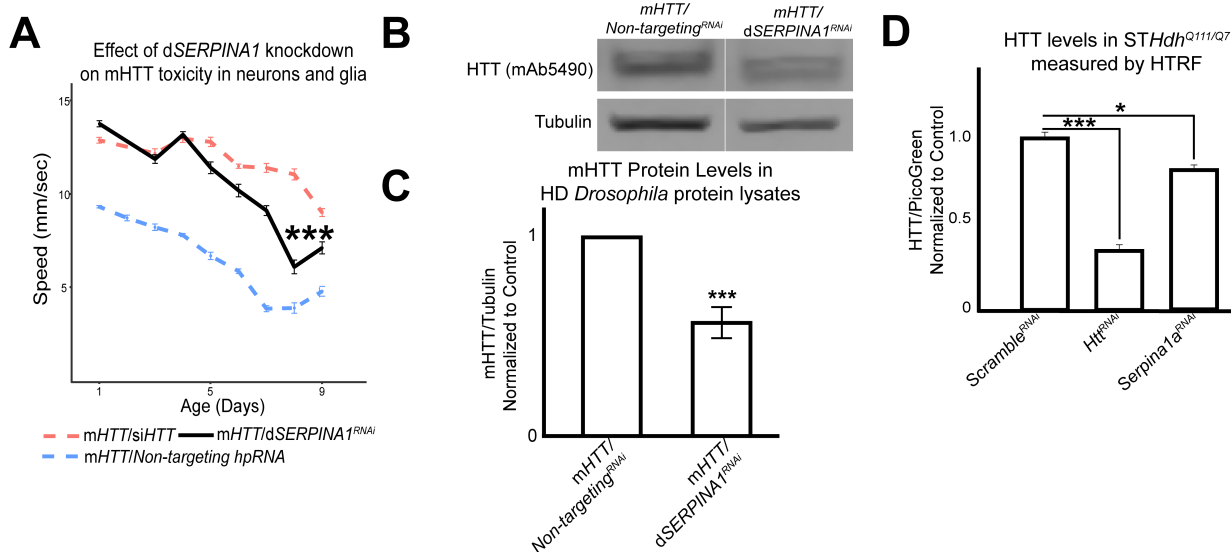

544  
 545 **Figure 6. Antagonizing the pathogenic overexpression of *SERPINA1* in neurons and glia mitigates**  
 546 **mHTT-induced behavioral impairments and lowers mHTT protein levels in *Drosophila* and HD**  
 547 **mouse striatal cells.**

548 A) Behavioral assays following knockdown of *dSERPINA1* in *Drosophila* expressing mHTT in neurons  
 549 and glia. \*\*\* indicates  $p < 0.001$  by linear mixed effects model and post-hoc pairwise comparison between  
 550 positive control and experimental animals. Points and error bars on the plot represent the mean  $\pm$  SEM of  
 551 three technical replicates. Each genotype was tested with 4-6 replicates of 10 animals.

552 B) Representative western blot showing lower levels of mHTT following knockdown of *dSERPINA1* in  
 553 *Drosophila* expressing mHTT in neurons and glia.

554 C) Quantification of five independent immunoblots showing the effect of *dSERPINA1* knockdown on  
 555 mHTT levels in *Drosophila* head protein lysates. \*\*\*  $p < 0.001$  between positive control and *dSERPINA1*  
 556 knockdown by one-way T-test.

557 D) Quantification of HTT protein levels in HD mouse striatal-derived cells (*STHdh*<sup>Q111/Q7</sup>) measured by  
 558 HTRF following treatment with a pool of scramble siRNAs (negative control), a pool of siRNAs against  
 559 *Htt*, and a pool of siRNAs against *Serpina1a*. Quantification is presented as a ratio of the emission signal  
 560 from the fluorescent D2 dye (HTT)/PicoGreen (number of cells per well).  $n = 9$  for each treatment group.  
 561 \*  $p < 0.05$  and \*\*\*  $p < 0.001$  between genotypes by Fisher's LSD test.

562 *Drosophila* Genotypes: *dSERPINA1* RNAi allele (*UAS-Spn42De*<sup>hpRNA</sup>, VDRC: 102622), positive control  
 563 (*elav*<sup>c155</sup>-*GAL4/w*<sup>1118</sup>; *UAS-non-targeting hpRNA/+*; *repo-GAL4, UAS-HTT*<sup>NT231Q128/+</sup>), treatment control  
 564 (*elav*<sup>c155</sup>-*GAL4/w*<sup>1118</sup>; *repo-GAL4, UAS-HTT*<sup>NT231Q128/UAS-siHTT</sup>), and *dSERPINA1* experimental  
 565 (*elav*<sup>c155</sup>-*GAL4/w*<sup>1118</sup>; *UAS-Spn42De*<sup>hpRNA/+</sup>; *repo-GAL4, UAS-HTT*<sup>NT231Q128/+</sup>).

566  
 567

## 568 **Materials and Methods**

### 569 *Lead Contact and Material Availability*

570 Further information and requests for resources and reagents should be directed to and will be fulfilled by  
571 the Lead Contact, Juan Botas ([jbotas@bcm.edu](mailto:jbotas@bcm.edu)).

572

### 573 *Drosophila models*

574 We began with *Drosophila* models expressing either N-terminal human HTT ( $HTT^{NT231Q128}$ ) or  
575 full-length (FL) HTT ( $HTT^{FLQ200}$ ) (Kaltenbach et al., 2007; Romero et al., 2008). The mHTT was  
576 expressed using either a pan-neuronal (*elav*) or a pan-glial driver (*repo*). Mutant strains for screening  
577 were obtained from Bloomington *Drosophila* Stock Center, GenetiVision, and the Vienna *Drosophila*  
578 Resource Center. All strains were maintained at 18°C in standard molasses, yeast extract, agar media until  
579 their experimental use. For RNA-sequencing, the full-length models were raised at 29°C and the N-  
580 terminal models were raised at 28°C. All behavioral experiments were performed on females raised at  
581 28°C.

582 In figure 3D, we used the following mutants to assess the effect of reduced expression of synaptic  
583 genes in mHTT animals on behavior: *UAS-non-targeting<sup>hpRNA</sup>* (Vienna *Drosophila* Resource Center,  
584 ID:13974), *CenGIA<sup>LOF</sup>* or *y<sup>1</sup>w<sup>\*</sup>;Mi{MIC}CenGIA<sup>M106024</sup>* (Bloomington *Drosophila* Stock Center, ID:  
585 44301), *vlc<sup>LOF</sup>* or *y<sup>1</sup>w<sup>67e23</sup>;P{w<sup>+mc</sup>=lacW}vlc<sup>k01109</sup>/CyO* (Bloomington *Drosophila* Stock Center, ID:  
586 10366), *trn<sup>LOF</sup>* or *y<sup>1</sup>w<sup>67e23</sup>;P{w<sup>+mc</sup>=lacW}trn<sup>S064117</sup>/TM3, Sb<sup>1</sup> Ser<sup>1</sup>* (Bloomington *Drosophila* Stock Center,  
587 ID: 4550), *cora<sup>LOF</sup>* or *P{ry<sup>t7.2</sup>=neoFRT}43D cora<sup>14</sup>/CyO* (Bloomington *Drosophila* Stock Center, ID:  
588 9099), *UAS-Sybeta<sup>hpRNA</sup>* (Vienna *Drosophila* Resource Center, ID:106559), and *UAS-mGluR<sup>RNAi</sup>* (National  
589 Institute of Genetics, Japan, ID: 11144-R3).

590 To generate *Drosophila* that expressed a small interfering RNA that knocked down human *HTT*  
591 (*UAS-siHTT*), we cloned a 378bp inverted EcoRI, XbaI fragment of N-terminal Htt into the pMF3 vector  
592 (*Drosophila* Genome Resource Center). This fragment maps to base pairs 406 to 783 of the human  
593 mRNA *Huntingtin*, which we cloned using the following primers:

594 Forward 5'-gaattcGCACCGACCAAAGAAAGAAC-3'

595 Reverse 5'-tctagaGCAGAAGGTTCCACCAGGTA-3'

596 We first digested the PCR product with EcoRI and ligated it with itself to obtain inverted repeats.  
597 We then digested the inverted repeat with XbaI and pasted the fragment into the pMF3 vector (also cut  
598 with XbaI); the resulting plasmid was injected into *Drosophila* embryos using standard methods (Dietzl et  
599 al., 2007). We validated that this line lowers mHTT levels.

600

601



602 *STHdh*<sup>Q111/Q7</sup> mouse striatal cells

603           Immortalized mouse striatal cells heterozygous for mHTT (*STHdh*<sup>Q111/Q7</sup>) were obtained from  
604 Coriell Cell Repositories (Camden, NJ) and cultured in DMEM (Life Technologies, cat. no. 11965)  
605 supplemented with 10% fetal bovine serum (Life Technologies, cat. no. 10082–147).

606  
607 *DEG identification in Drosophila HD models*

608           We performed RNA-seq on head tissue collected from *Drosophila* expressing N-terminal (*UAS-*  
609 *HTT*<sup>NT231Q128</sup>) or full-length (*UAS-HTT*<sup>FLQ200</sup>) human mHTT in neurons (*elav-GAL4*) or glia (*repo-GAL4*).  
610 For each combination of HD model and driver, RNA-seq was performed at three time points to capture  
611 the early, middle, and late phases of disease pathogenesis, corresponding to behavioral deficits caused by  
612 mHTT-induced neuronal or glial dysfunction. At each timepoint, samples for HD and age-matched  
613 controls were collected in triplicate. *Drosophila* expressing the N-terminal construct and corresponding  
614 controls were obtained at 7,9, and 11 days post-eclosion for the neuronal driver, and at 5, 7, and 8 days  
615 post-eclosion for the glial driver. *Drosophila* expressing the full-length construct, samples were obtained  
616 at 18, 20, and 22 days post-eclosion for both the neuronal and glial driver. For RNA-seq the neuronal N-  
617 terminal, glial N-terminal, and glial full-length model *Drosophila* were raised at 28°C. The neuronal full-  
618 length model *Drosophila* were raised at 29°C. For each genotype at each timepoint, we collected an  
619 equivalent number of control animals (*elav-GAL4* or *repo-GAL4*) that were raised in the same conditions.

620           Three replicates of 50 virgin females were collected for each genotype and timepoint. Animals were  
621 aged in the appropriate temperature and were transferred to fresh food daily until tissue was harvested. At  
622 the selected ages, animals were transferred to 1.5ml tubes, flash frozen in liquid nitrogen, vigorously  
623 shaken and then sieved to collect 50 heads/genotype/replica (~5mg tissue/replica). Total RNA was  
624 extracted using the miRNeasy Mini Kit (Qiagen Cat. # 210074).

625           RNA-seq profiling and preprocessing was performed by Q2 Solutions (Morrisville, North  
626 Carolina). Samples were converted into cDNA libraries using the Illumina TruSeq Stranded mRNA  
627 sample preparation kit (Illumina Cat. #20020595) and were sequenced using HiSeq-Sequencing-2x50bp-  
628 PE. Initial analysis was performed using Q2 Solution in-house mRNA<sub>v7</sub> pipeline with a median of 49  
629 million actual reads. After adapter sequences were removed, the reads were aligned to the *Drosophila*  
630 *melanogaster* transcriptome using Bowtie version 0.12.9 (Langmead and Salzberg, 2012). Expression was  
631 quantified using RSEM version 1.1.19, resulting in a median of 11,214 genes and 18,604 isoforms  
632 detected (Li and Dewey, 2011).

633  
634 *Homology mapping of HD DEGs by network-based intersection*

635           Three homology maps were constructed to define conserved genes that were concordantly

636 dysregulated in response to mHTT toxicity: a *Drosophila*-human map, a *Drosophila*-mouse map, and a  
637 mouse-human map. The *Drosophila*-human map and *Drosophila*-mouse map were both obtained from  
638 DIOPT version 6.0.2 (Hu et al., 2011). To capture homology that results from evolutionary convergence  
639 and divergence we included lower DIOPT scores between *Drosophila* and mammals, instead of fitting  
640 one-to-one mappings between these species. The mouse-human homology mapping was obtained from  
641 the Mouse Genome Informatics (MGI) database hosted by Jackson Laboratories (Blake et al., 2017).

642 We integrated these three homology maps by representing each map as an undirected bipartite  
643 graph, where nodes are genes of one species and edges represent homology between two genes across  
644 species. All components were then merged to form an undirected graph where each node represents a  
645 gene name and corresponding species. We applied this integrated homology map consisting of nodes  
646 representing the *Drosophila*, mouse, and human dysregulated genes, and all edges induced by the  
647 corresponding nodes, to obtain a subgraph consisting of multiple connected components. If any individual  
648 connected component contained nodes that belong to all three species, we characterized all genes within  
649 the connected component as concordant.

650

#### 651 *Protein-protein interaction network and clustering*

652 To examine how the upregulated and downregulated core genes interact functionally, we used  
653 STRING v10.5 (Szklarczyk et al., 2015). Only high-confidence interactions (edge weight > 0.7) were  
654 considered. Each node is converted from an ENSEMBL ID to human Entrez ID via the provided mapping  
655 file (v10, 04-28-2015). Four subgraphs of STRING were then induced on each core gene set separately.  
656 Nodes were further clustered with the InfoMap community detection algorithm (Rosvall and Bergstrom,  
657 2008), implemented in the Python iGraph package, with the default settings (trials = 10) (Csardi and  
658 Nepusz).

659

#### 660 *Drosophila behavioral assay*

661 We crossed female virgins that carried the mutant HTT (mHTT) transgene under the control of  
662 either the neuronal or glial driver, or the cell-specific driver alone, to males carrying the experimental  
663 allele. We introduced a heat-shock-induced lethality mutation on the Y chromosome ( $Y^{P\{hs-hid\}}$ ) to the  
664 disease and cell-specific driver stocks to increase the efficiency of virgin collection (Starz-Gaiano et al.,  
665 2001). For crosses involving alleles that were lethal or sterile mutations on the X chromosome, this  
666 mating strategy was reversed. For behavioral assays,  $elav>HTT^{NT231Q128}$  and  $repo>HTT^{NT231Q128}$  animals  
667 were raised and maintained at 28.5°C.  $Elav,repo>HTT^{NT231Q128}$  animals were raised and maintained at  
668 25°C.

669 The negative geotaxis climbing assay was performed using a custom robotic system (SRI

670 International, available in the Automated Behavioral Core at the Dan and Jan Duncan Neurological  
671 Research Institute). The robotic instrumentation elicited negative geotaxis by “tapping” *Drosophila*  
672 housed in 96-vial arrays. After three taps, video cameras recorded and tracked the movement of animals  
673 at a rate of 30 frames per second for 7.5 seconds. For each genotype, we collected 4 to 6 replicates of 10  
674 animals to be tested in parallel. Each trial was repeated three times. The automated, high-throughput  
675 system is capable of assaying 16 arrays (1,536 total vials) in ~3.5 hours. To transform video recordings  
676 into quantifiable data, individual *Drosophila* were treated as an ellipse, and the software deconvoluted the  
677 movement of individuals by calculating the angle and distance that each ellipse moves between frames.  
678 The results of this analysis were used to compute more than two dozen individual and population metrics,  
679 including distance, speed, and stumbles.

680 Software required to run and configure the automation and image/track the videos include: Adept  
681 desktop, Video Savant, MatLab with Image Processing Toolkit and Statistics Toolkit, RSLogix (Rockwell  
682 Automation), Ultraware (Rockwell Automation). Additional custom designed software includes: Assay  
683 Control – SRI graphical user interface for controlling the assay machine; Analysis software bundles:  
684 FastPhenoTrack (Vision Processing Software), TrackingServer (Data Management Software),  
685 ScoringServer (Behavior Scoring Software), Trackviewer (Visual Tracking Viewing Software).

686

#### 687 *In situ and immunofluorescence in HD mouse brain sections*

688 mRNA in situ hybridization (ISH) and immunofluorescence were performed on 25- $\mu$ m thick  
689 coronal brain sections cut from fresh-frozen brain harvested from a 6-month old *Hdh<sup>Q175/+</sup>* mouse.  
690 We generated digoxigenin (DIG)-labeled mRNA antisense probes against *Nrxn3* using reverse-  
691 transcribed mouse cDNA as a template and an RNA DIG-labeling kit from Roche (Sigma). Primer  
692 and probe sequences for the *Nrxn3* probe is available in Allen Brain Atlas ([http://www.brain-](http://www.brain-map.org)  
693 [map.org](http://www.brain-map.org)). ISH was performed by the RNA In Situ Hybridization Core at Baylor College of Medicine  
694 using an automated robotic platform as previously described (Yaylaoglu et al., 2005) with modifications  
695 of the protocol for fluorescent ISH. In brief: after the described washes and blocking steps, the DIG-  
696 labeled probe was visualized using a tyramide-Cy3 Plus kit (1:50 dilution, 15-minute incubation, Perkin  
697 Elmer). Following washes in phosphate buffered saline (PBS) the slides were stained with 1:500 anti-  
698 GFAP rabbit polyclonal antibody (DAKO, Z0334) diluted in 1% blocking reagent in Tris buffered saline  
699 (Roche Applied Science, 11096176001) overnight at 4°C. After washing, slides were treated with 1:500  
700 anti-rabbit IgG Alexa 488 secondary antibody for 30 min at room temperature (Invitrogen, A-11008). The  
701 slides were stained with DAPI and cover slipped using ProLong Diamond (Invitrogen, P36970). Images  
702 were taken at 63x magnification using a Leica SP8 confocal microscope.

703

704 *Immunoblot of Drosophila lysates*

705 For all immunoblot experiments, *Drosophila* were raised and maintained at 25°C. Female F1  
706 progeny were collected and flash-frozen 24 hours after eclosion. Heads were separated by genotype and  
707 divided into 8 individuals per replicate. *Drosophila* heads were lysed and homogenized in 30uL of lysis  
708 buffer (1x NuPage LDS Sample Buffer, 10% beta-mercapethanol) and boiled at 100 °C for 10 minutes.  
709 Lysates were loaded on a 4-12% gradient Bis-Tri NuPage (Invitrogen) gels and run at a constant voltage  
710 of 80V for an hour and then 120V for 30 minutes. For mHTT levels, a 20% methanol transfer buffer was  
711 used to transfer proteins at 4°C overnight using a 200mA current. For mCD8::GFP, proteins were  
712 transferred using a 10% methanol buffer for 2 hours at 4°C a 200mA current.

713 Prior to antibody treatment, all membranes were treated with blocking solution (5% non-fat milk in  
714 1x TBST). For primary antibody treatment all antibodies were diluted in blocking solution. To assess  
715 mHTT levels, membranes were the treated with a 1:500 mouse anti-HTT solution (mAb5490, EMD  
716 Millipore) overnight. For a loading control, membranes were subsequently treated with a 1:1000 alpha-  
717 tubulin antibody (Abcam EP1332Y). 1:1000 Rabbit anti-GFP (ThermoFisher A-11122) was used to  
718 assess levels of mCD8::GFP, and 1:1000 anti-lamin C (Hybridoma Bank LC28.26) was used as a loading  
719 control. All blots were treated with 1:5000 Goat anti-Mouse (IRDye® 800CW Goat anti-Mouse IgG) and  
720 Goat anti-Rabbit (RDye® 680RD Goat anti-Rabbit IgG) secondary antibodies diluted in blocking solution  
721 for 1 hour and imaged using the Odyssey CLx imager (LI-COR Biosciences).

722

723 *Knockdown of Serpina1a and homogenous time-resolved fluorescence in STHdh<sup>Q111/Q7</sup> cells*

724 *STHdh<sup>Q111/Q7</sup>* cells were reverse transfected with pooled small interfering RNAs (siRNAs) using  
725 Lipofectamine 2000 (Life Technologies, cat. no. 11668). Cells were treated with a pool of four small  
726 siRNAs per gene with the following sequences (Qiagen 1027280):

- 727 • *Htt*
- 728 1. 5'-GAAAUUAAGGUUCUGUUGA-3'
- 729 2. 5'-CCACUCACGCCAACUAUAA-3'
- 730 3. 5'-GAUGAAGGCUUUCGAGUCG-3'
- 731 4. 5'-UAACAUGGCUCAUUGUGAA-3'
- 732 • *Serpina1a*
- 733 1. 5'-GAAUAUAACUUGAAGACAC-3'
- 734 2. 5'-GGGCUGACCUCUCCGGAU-3'
- 735 3. 5'-UGGUAGAUGCCACACAUAA-3'
- 736 4. 5'-GAAAGAUAGCUGAGGCGGU-3'
- 737 • *Scramble*

738

739       Following siRNA treatment, cell lysis buffer (1X phosphate buffered saline (PBS) with 1%  
740 TrintonX-100 and 1% EDTA-free protease inhibitor (Calbiochem, #539134)) was added to each well and  
741 the plate was put on ice for 30 minutes. After incubation, cells were homogenized and lysates were  
742 extracted. Separately, HTRF assay buffer was prepared using 50 mM NaH<sub>2</sub>PO<sub>4</sub>(pH7.4), 400 mM KF,  
743 0.1% bovine serum albumin (BSA), 0.05% Tween-20 and Quant-ITTM Picogreen(1:1500). The donor  
744 antibody, 2B7 conjugated to terbium, was diluted in HTRF assay buffer to a concentration 0.023 ug/mL  
745 of and the acceptor antibody, mAb2166 (SigmaAldrich) conjugated to fluorescent dye D2, was diluted for  
746 a final concentration of 1.4 µg/mL. 5 µl of the HTRF buffer was added to 5uL of cell lysates (5 µl) in  
747 each well of a 384-well plate. Lysates were then incubated at 4°C overnight.

748       HTRF was performed in a PerkinElmer EnVision multilabel plate reader (model #2104), measuring  
749 the 615nm and 665nm, as well as the Picogreen signal at 485nm. Each sample was measured following  
750 30 cycles of the excitation at an interval of 16.6 ms.

751

#### 752 *DEG identification in Drosophila HD models*

753       Differential expression analysis used the DESeq2 R package on a total of twelve comparisons (two  
754 HD models, two cell-specific drivers, and three timepoints) (Love et al., 2014). Outlier detection was  
755 performed using principle component analysis on normalized gene expression data, resulting in one  
756 sample being removed. To establish a list of upregulated and downregulated DEGs in *Drosophila*, we  
757 examined the false discovery rate (FDR) at every time point in both genetic models. If the FDR was less  
758 than 0.05 at any data point in the HD models compared to control, we established that that gene was  
759 dysregulated due to the presence of mHTT in either neurons or glia. We did not take the magnitude of  
760 fold-change into account, only the direction (upregulated or downregulated) (Langfelder et al., 2016).

761

#### 762 *Reanalysis of HD patient-derived and knock-in mouse model transcriptomes*

763       The identification of DEGs from humans was based on microarray data from brain tissue collected  
764 post-mortem in patients with HD and age-matched, healthy individuals. For consistency with the reported  
765 results, we examined the summary statistics of the caudate probe on the Affymetrix U133 A and B  
766 microarrays. We computed the FDR by applying the Benjamini-Hochberg procedure to the p-values  
767 reported in Hodges et al. 2006. A probe was said to be dysregulated if the absolute value of its Fold  
768 Change was greater than 1.2 (or log<sub>2</sub>FC >0.263) and the FDR was less than 0.05. Since multiple  
769 Affymetrix probes can match to the same Entrez ID, we specified if that an Entrez-identified human gene  
770 was dysregulated, if there exists a matching probe that is also dysregulated.

771       We established lists of upregulated and downregulated DEGs in mice from RNA-seq data presented

772 in Langfelder et al. (Langfelder et al., 2016), where the authors profiled mRNA of an allelic series in a  
773 HD knock-in mouse model. We reanalyzed data from the striatum at 6 months, identifying gene  
774 expression alterations with that were significant ( $FDR < 0.05$ ) in the continuous-Q case, a summary  
775 regression variable derived from DESeq that tests the association of the expression profile with Q-length  
776 as a numeric variable (Love et al., 2014).

777

#### 778 *Connectivity of the mHTT responding networks compared to a striatal proteome background*

779 We randomly sampled 471 proteins (equivalent to the average number of input proteins in the  
780 mHTT Responding networks) 1,000 times, from 15,884 proteins that are expressed in the striatum.  
781 Implementing the same parameters that were used for the mHTT responding networks, we constructed  
782 clustered PPI networks with the random striatal protein lists as inputs. We calculated the average node  
783 degree and average node betweenness within each network of random genes and compiled a distribution  
784 using these results. A Z-score was calculated using the distribution compiled from the random striatal  
785 networks. These Z-scores were then used to calculate the p-values that were reported in Supplemental  
786 Table 2. All simulations and statistical calculations were performed in R.

787

#### 788 *Analysis of behavioral screen in Drosophila*

789 We assessed behavior in *Drosophila* as the speed at which individual animals within one vial  
790 moved as a function of age and genotype using a non-linear random mixed effects model regression.  
791 Specifically, we looked at differences in regression between genotypes with time (additive effect,  
792 represented by a shift in the curve) or the interaction of genotype and time (interactive effect, represented  
793 by a change in the slope of the curve). We reported p-values representative of the pairwise post-hoc tests  
794 for testing whether all possible pairs of genotype curves are different in both models. We considered  
795 differences between positive controls and experimental perturbations of  $p < 0.001$  to be significant. P-  
796 values were adjusted for multiplicity using Holm's procedure. Code for this analysis is available upon  
797 request from the Botas Laboratory. All graphing and statistical analyses were performed in R.

798

#### 799 *Statistical analysis for western blot and homogenous time-resolved fluorescence*

800 Images of western blots were analyzed using the Image Studio Lite software. We used an  
801 equivalent area to measure signal intensity across all replicates. We present proteins of interests as a ratio  
802 of the target protein to loading control. Experimental replicates were compared to controls using a one-  
803 sided Student's T-Test. For HTRF, levels of mHTT were calculated by taking the ratio of the fluorescence  
804 signals (665nM/615nM) and normalizing to the Picogreen signal in experimental groups after subtracting  
805 the signal from wells containing only sample buffer and HTRF buffer, without protein lysates. Results are

806 presented as the average and standard error of the mean of the  $\Delta F$  (%) ( $\Delta F$  (%) = (Sample ratio – blank  
807 ratio) / blank ratio  $\times$  100). P-values were calculated using Fisher's LSD test.

808

809 **Data and Software Availability**

810

811 Raw data from *Drosophila* and mouse *STHdh*<sup>Q111/Q7</sup> analysis available upon request. RNA-

812 sequencing from the HD *Drosophila* models is available in NCBI GEO under accession GSE157287.

813 Code for analysis of *Drosophila* behavioral assay in R available upon request.

814 **Supplemental Figures**

815

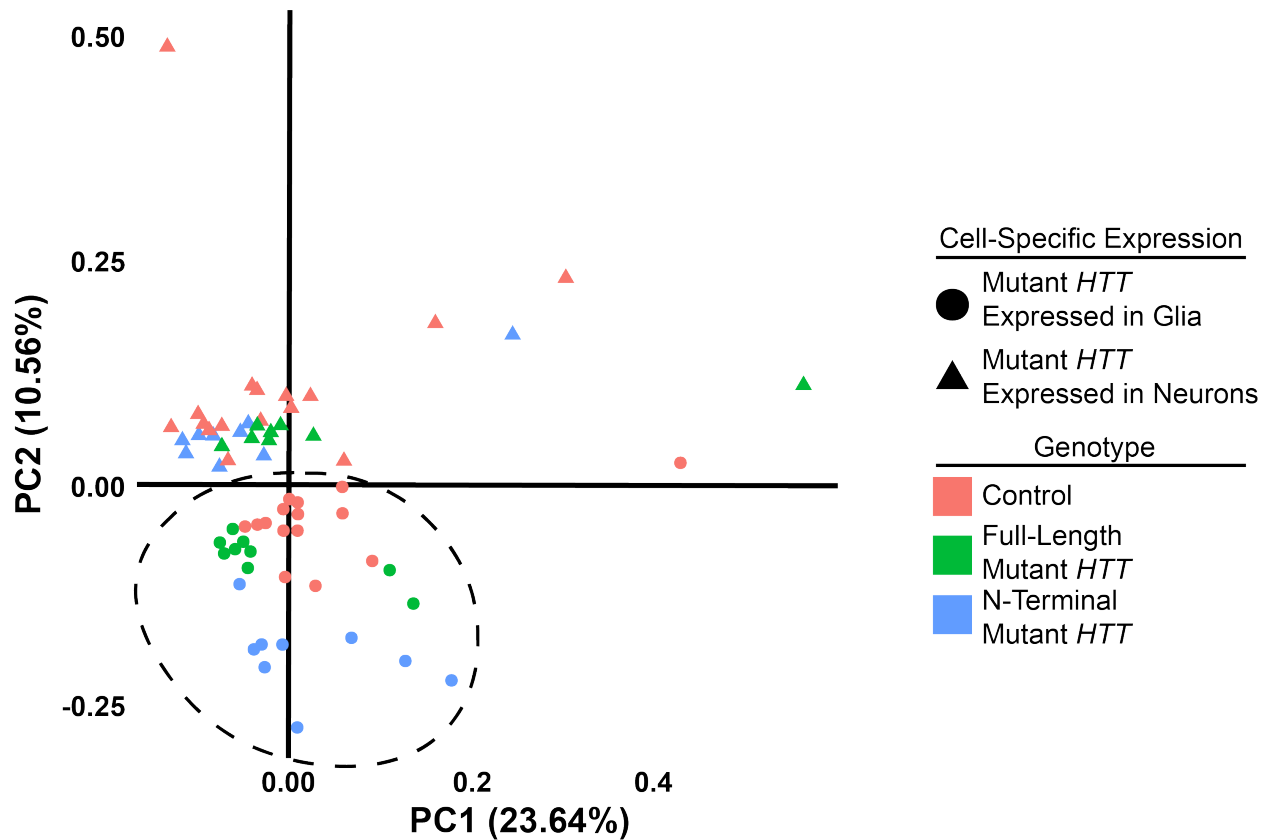

816

817 **Supplemental Figure 1. Expressing mHTT in *Drosophila* glia or neurons leads to distinct gene**  
818 **expression profiles. In contrast, the full-length and N-terminal models show relatively similar gene**  
819 **expression profiles, Related to Figure 1.**

820 Principal component analysis (PCA) plot of RNA-sequencing samples. Circles represent samples with  
821 transgenic expression in glia (*repo-GAL4*), while triangles represent samples transgenic expression in  
822 neurons (*elav-GAL4*). Red points represent control  $w^{1118}$  controls, green points represent animals  
823 expressing the full-length protein mHTT transgene ( $HTT^{FLQ200}$ ), and blue points represent animals  
824 expressing the N-terminal mHTT fragment transgene ( $HTT^{NT231Q128}$ ). Outliers skew the first component on  
825 the x-axis (23.64% of the variability). Samples expressing mHTT in glia separate from those expressing it  
826 in neurons along the second component on the y-axis (10.56% of the variability; dashed circle).

827



## A

### Whole proteome background

|                | mHTT expressed in neurons |        | mHTT expressed in glia |        |
|----------------|---------------------------|--------|------------------------|--------|
|                | Up                        | Down   | Up                     | Down   |
| Input proteins | 521                       | 452    | 424                    | 536    |
| Edges          | 889                       | 993    | 589                    | 1410   |
| PPI enrichment | <2E-16                    | <2e-16 | 1.63E-12               | <2E-16 |

## B

### Striatal background

|                                            | mHTT expressed in neurons |          | mHTT expressed in glia |          |
|--------------------------------------------|---------------------------|----------|------------------------|----------|
|                                            | Up                        | Down     | Up                     | Down     |
| Average degree enrichment in striatum      | 1.01E-06                  | 9.68E-08 | 1.17E-03               | 3.37E-15 |
| Average betweenness enrichment in striatum | 3.44E-06                  | 3.63E-03 | 3.23E-03               | 5.11E-04 |
| Number of clusters enrichment in striatum  | 3.09E-06                  | 3.09E-06 | 1.23E-02               | 4.31E-03 |

828

829 **Supplemental Table 2. Network connectivity of DEGs responding to glial or neuronal mHTT**

830 **expression, Related to Figure 2.**

831 Protein-protein interaction (PPI) networks (STRING-db) built from HD DEGs are significantly more  
 832 connected (Probability Distribution Test) than networks of equivalent size built from proteins selected  
 833 randomly out of a whole proteome (A) or striatal (B) background. HD DEGs are concordantly  
 834 upregulated or downregulated in HD human striatal tissue, knock-in HD mouse striatal tissue, and tissue  
 835 taken from *Drosophila* expressing mHTT in neurons or glia.

836

**A** 837 **Upregulated Neuronal mHTT Response Clusters**

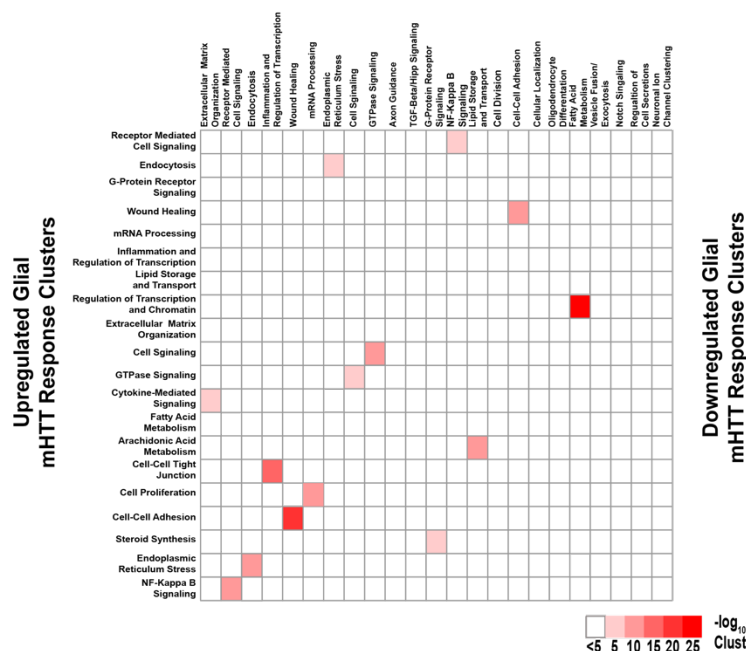

**Downregulated Neuronal mHTT Response Clusters**

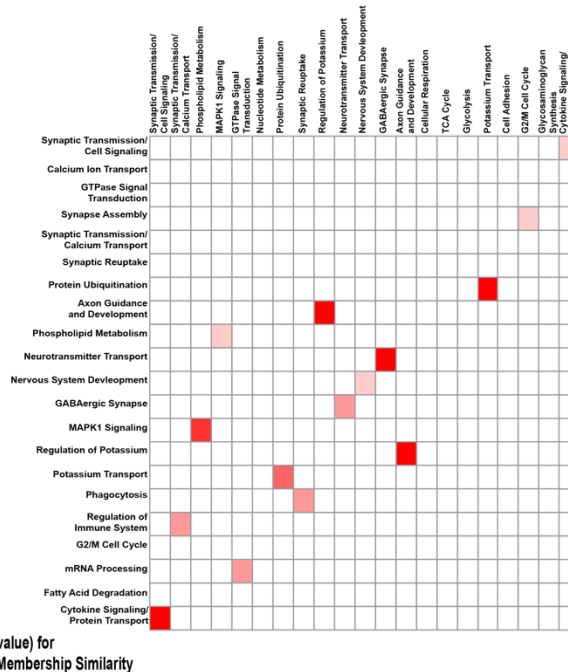

**B**

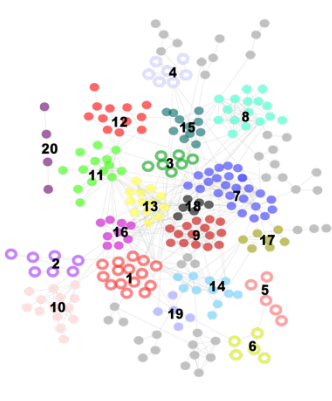

**Clusters Upregulated in Response to mHTT in Glia Only**

- |                                          |                                      |
|------------------------------------------|--------------------------------------|
| 1 Transcription and Chromatin Remodeling | 4 Cytokine Signaling/Innate Immunity |
| 2 Amino Acid Metabolism                  | 5 Arachidonic Acid Metabolism        |
| 3 Cell Proliferation                     | 6 Steroid Synthesis                  |

**Clusters Upregulated in Response to mHTT in Neurons or Glia**

- |                                                    |                                        |
|----------------------------------------------------|----------------------------------------|
| 7 Receptor Mediated Cell Signaling                 | 14 Lipid Transport and Storage         |
| 8 Endocytosis                                      | 15 GTPase Signaling/Actin Cytoskeleton |
| 9 G-Protein Coupled Receptor Signaling             | 16 Cell Signaling                      |
| 10 mRNA Processing                                 | 17 Fatty Acid Metabolism               |
| 11 Wound Healing and Inflammation                  | 18 Adhesion                            |
| 12 Extracellular Matrix Organization and Signaling | 19 Endoplasmic Reticulum Stress        |
| 13 Inflammation/Regulation of Transcription        | 20 NF-Kappa B Signaling                |

**Clusters Downregulated in Response to mHTT in Glia Only**

- |                                              |                          |
|----------------------------------------------|--------------------------|
| 1 Synapse Assembly                           | 4 Phagocytosis           |
| 2 Calcium Ion Transport                      | 5 mRNA Processing        |
| 3 Regulation of Immune System and Metabolism | 6 Fatty Acid Degradation |

**Clusters Downregulated in Response to mHTT in Neurons or Glia**

- |                                           |                                             |
|-------------------------------------------|---------------------------------------------|
| 7 Synaptic Transmission/Cell Signaling    | 15 Synaptic Reuptake                        |
| 8 GTPase Signal Transduction              | 16 Axon Guidance and Development            |
| 9 Synaptic Transmission/Calcium Transport | 17 GABAergic Synapse                        |
| 10 Phospholipid Metabolism                | 18 Potassium Transport                      |
| 11 Protein Ubiquitination                 | 19 Regulation of Potassium                  |
| 12 MAPK1 Signaling                        | 20 Cytokine Singaling and Protein Transport |
| 13 Nervous System Development             | 21 G2/M Cell Cycle Transition               |
| 14 Neurotransmitter Transport             |                                             |

**C**

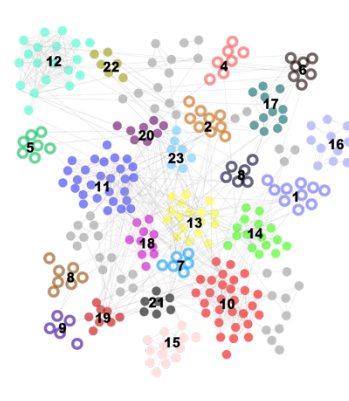

**Clusters Upregulated in Response to mHTT in Neurons Only**

- |                                         |                                   |
|-----------------------------------------|-----------------------------------|
| 1 TGF-Beta and Hippo Signaling Pathways | 6 Vesicle Fusion and Exocytosis   |
| 2 Cell Signaling/Axon Guidance          | 7 Notch Signaling                 |
| 3 Cellular Localization                 | 8 Regulation of Secretions        |
| 4 Cell Division                         | 9 Neuronal Ion Channel Clustering |
| 5 Oligodendrocyte Differentiation       |                                   |

**Clusters Upregulated in Response to mHTT in Neurons or Glia**

- |                                                    |                                         |
|----------------------------------------------------|-----------------------------------------|
| 10 Extracellular Matrix Organization and Signaling | 17 GTPase Signaling/Actin Cytoskeleton  |
| 11 Receptor Mediated Cell Signaling                | 18 Cell Signaling                       |
| 12 Endocytosis                                     | 19 G-Protein Coupled Receptor Signaling |
| 13 Inflammation/Regulation of Transcription        | 20 NF-Kappa B Signaling                 |
| 14 Wound Healing and Inflammation                  | 21 Cell-Cell Adhesion                   |
| 15 mRNA Processing                                 | 22 Fatty Acid Metabolism                |
| 16 Endoplasmic Reticulum Stress                    | 23 Lipid Transport and Storage          |

**Clusters Downregulated in Response to mHTT in Neurons Only**

- |                         |                               |
|-------------------------|-------------------------------|
| 1 Nucleotide Metabolism | 4 Tricarboxylic Acid Cycle    |
| 2 Glycolysis            | 5 Cell Adhesion               |
| 3 Cellular Respiration  | 6 Glycosaminoglycan Synthesis |

**Clusters Downregulated in Response to mHTT in Neurons or Glia**

- |                                           |                                             |
|-------------------------------------------|---------------------------------------------|
| 7 Synaptic Transmission/Cell Signaling    | 15 GABAergic Synapse                        |
| 8 Synaptic Transmission/Calcium Transport | 16 Synaptic Reuptake                        |
| 9 MAPK1 Signaling                         | 17 Potassium Transport                      |
| 10 Phospholipid Metabolism                | 18 Axon Guidance and Development            |
| 11 GTPase Signal Transduction             | 19 Neurotransmitter Transport               |
| 12 Protein Ubiquitination                 | 20 G2/M Cell Cycle Transition               |
| 13 Regulation of Potassium                | 21 Cytokine Singaling and Protein Transport |
| 14 Nervous System Development             |                                             |

838 **Supplemental Figure 2. Network of DEGs responding concordantly to *mHTT* expression in glia or**  
839 **neurons, Related to Figure 2.**

840 A) Heatmap representing all pairwise comparisons between clusters of upregulated (left) and  
841 downregulated (right) DEGs in response to glial (x-axis) or neuronal (y-axis) *mHTT* expression. Clusters  
842 are labeled using annotations for biological processes represented by DEGs within each cluster (Refer to  
843 **Tables S3**). Color is scaled to represent the significance of membership similarity calculated using a  
844 hypergeometric distribution. Colors represent the  $-\log_{10}(\text{p-value})$  and range from white ( $5 <$ ) to dark red  
845 ( $>25$ ).

846 B) PPI Network (STRING-db) of upregulated (top) and upregulated DEGs in human HD tissue, HD  
847 mouse models, and *Drosophila* expressing *mHTT* in glia.

848 C) PPI Network (STRING-db) of upregulated (top) and upregulated DEGs in human HD tissue, HD  
849 mouse models, and *Drosophila* expressing *mHTT* in neurons.

850 Refer to **Supplemental Table 3** for gene membership, as well as GO Panther and KEGG terms enriched  
851 genes within each cluster. Numbers in (B) and (C) correspond to annotations. Hollow circles correspond  
852 to clusters of DEGs that are dysregulated in response to *mHTT* (*HTT<sup>FLQ200</sup>* or *HTT<sup>NT231Q128</sup>*) expression in  
853 only glia (*repo-GAL4*) or neurons (*elav-GAL4*). Solid circles correspond to clusters of DEGs that are  
854 dysregulated in response to *mHTT* expression in neurons or glia.

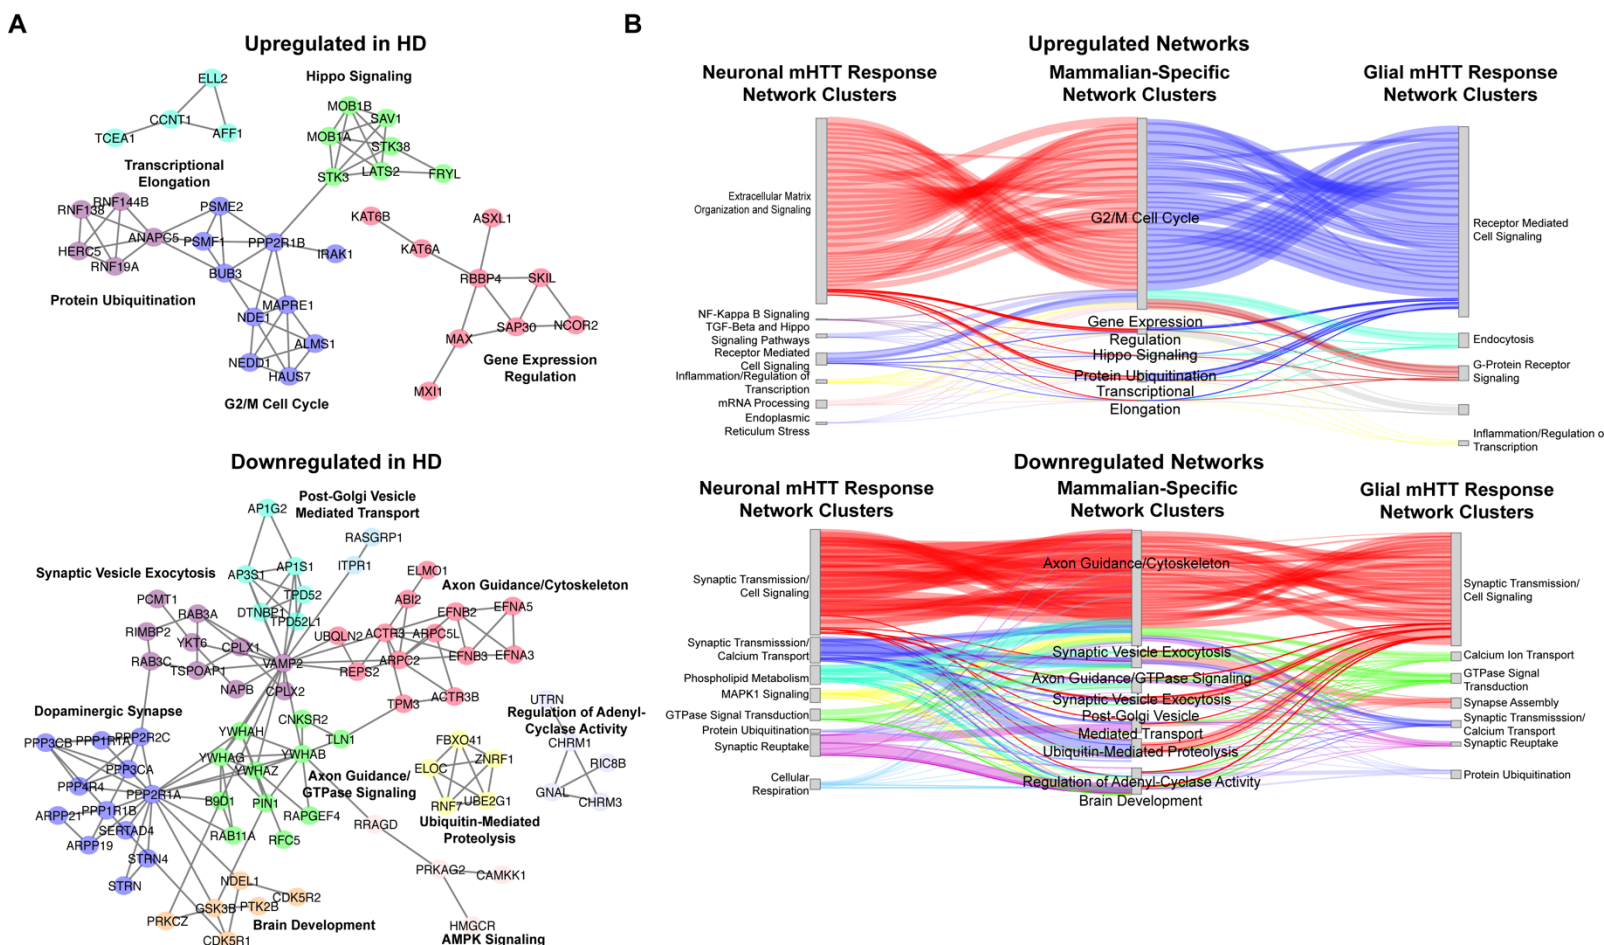

855  
 856 **Supplemental Figure 3. Network of DEGs concordantly altered in human HD tissue and HD mouse**  
 857 **models, but not in *Drosophila* HD models, Related to Figure 2.**

858 A) Clustered, annotated PPI network (STRING-db) of DEGs concordantly upregulated (top) and  
 859 downregulated (down) in human HD striatal tissue collected post-mortem (Hodges et al. 2006) and the  
 860 allelic series of knock-in HD mouse models (Langfelder et al. 2016), but not in the *Drosophila* models  
 861 (this study). Clusters are annotated for the synthesis of the top five most significantly enriched GO  
 862 Panther Biological Process and KEGG terms (FDR<0.05).

863 B) Sankey plot for genes concordantly upregulated (top) and upregulated (bottom) in HD patients and  
 864 mouse model only (middle) connecting to cluster of DEGs that are concordantly upregulated in patients,  
 865 mice, and *Drosophila* as a consequence of expressing *mHTT* ( $HTT^{FLQ200}$  or  $HTT^{NT231Q128}$ ) in neurons (*elav*)  
 866 (left) or in glia (*repo*) (right). Edges represent protein-protein interactions between connected DEGs  
 867 (STRING-db).

868  
 869

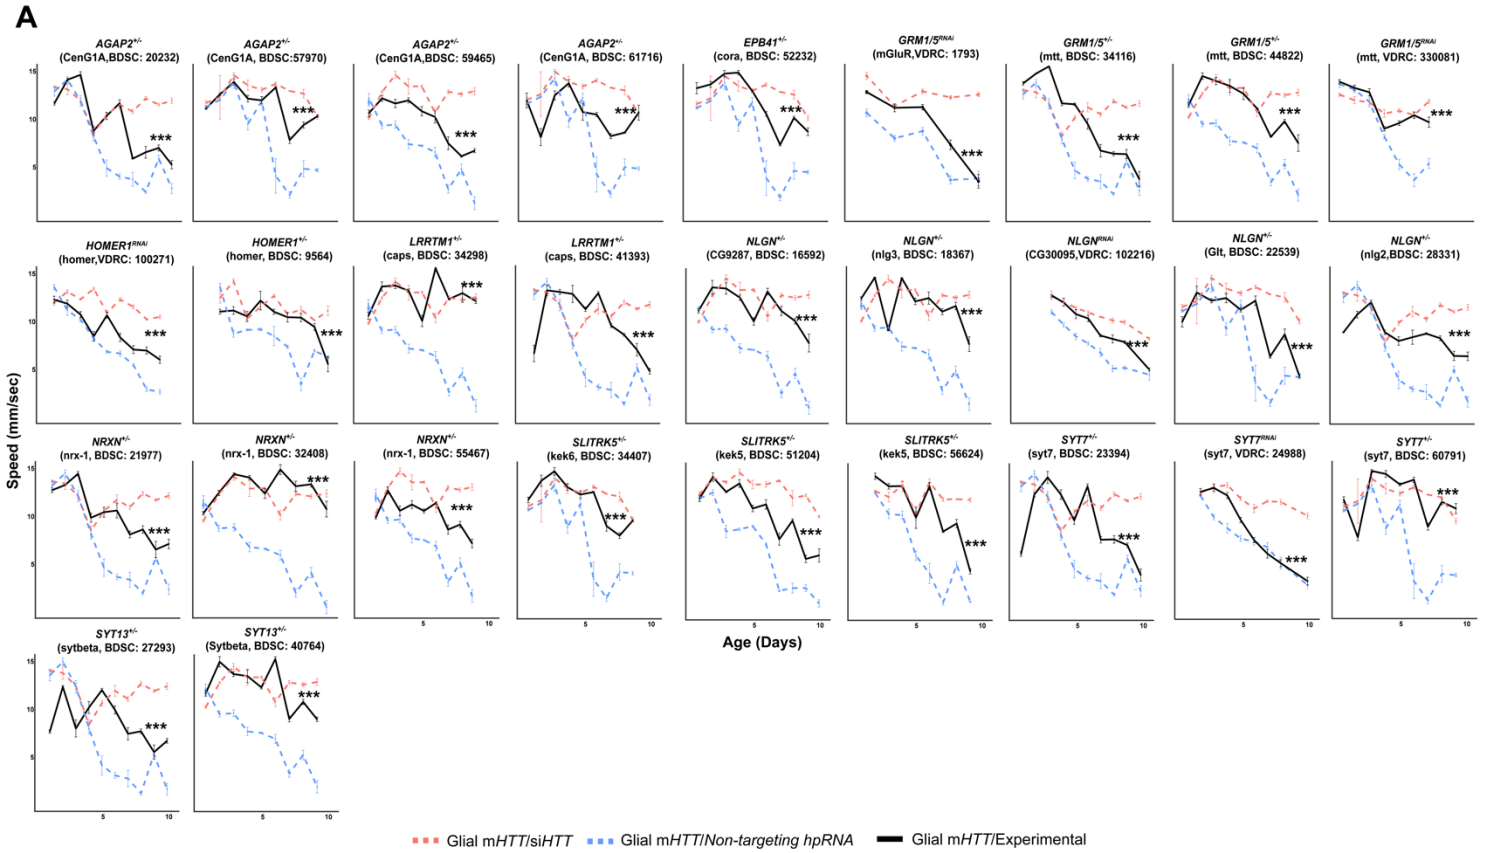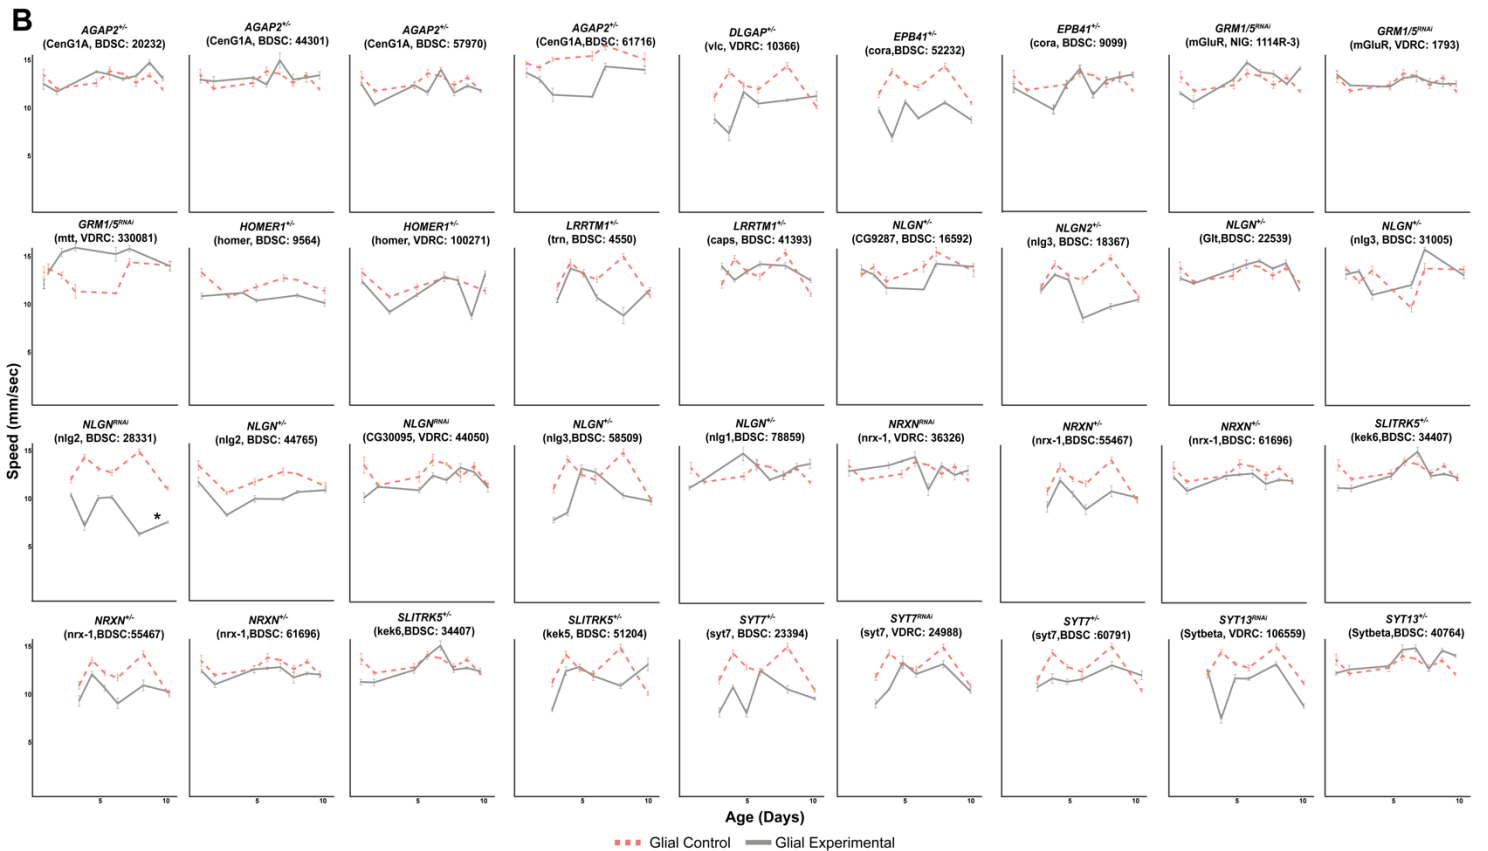

871 **Supplemental Figure 4. Suppressors of glial mHTT-induced behavioral impairments among DEGs**  
872 **in the Synapse Assembly cluster, Related to Figure 3.**

873 A) Representative graphs of behavioral assays (climbing speed as a function of time) of *Drosophila*  
874 expressing mHTT in glia (*repo>HTT<sup>NT231Q128</sup>*) and alleles knocking down genes in the synapse assembly  
875 cluster. \*\*\*  $p < 0.001$  between the positive control (dashed blue line) and experimental allele (solid black  
876 line) by linear mixed effects model and post-hoc, pairwise analysis (see Methods). Refer to  
877 **Supplemental Table 4** for a summary of the full statistical analysis.

878 B) Representative graphs of the climbing speed of wildtype *Drosophila* as a function of time with the  
879 glial driver (*repo-GAL4*) expressing alleles that suppress glial mHTT-induced behavioral impairments.  
880 Points and error bars on the plot represent the mean speed  $\pm$ SEM of three technical replicates. Each  
881 genotype was tested with 4-6 replicates of 10 animals. The gray line represents climbing speed of animals  
882 expressing the modifier allele in the *repo-GAL4* background.

883 *Drosophila* Genotypes: Positive control (*w<sup>1118</sup>/+; UAS- non-targeting hpRNA/+; repo-GAL4, UAS-*  
884 *HTT<sup>NT231Q128</sup>/+*), treatment control (*w<sup>1118</sup>; repo-GAL4, UAS- HTT<sup>NT231Q128</sup>/UAS-siHTT*), experimental  
885 (*w<sup>1118</sup>; repo-GAL4, UAS- HTT<sup>NT231Q128</sup>/modifier*), negative control (*w<sup>1118</sup>; UAS- non-targeting hpRNA/+;*  
886 *repo-GAL4/+*), and experimental control (*w<sup>1118</sup>; repo-GAL4/modifier*).

887

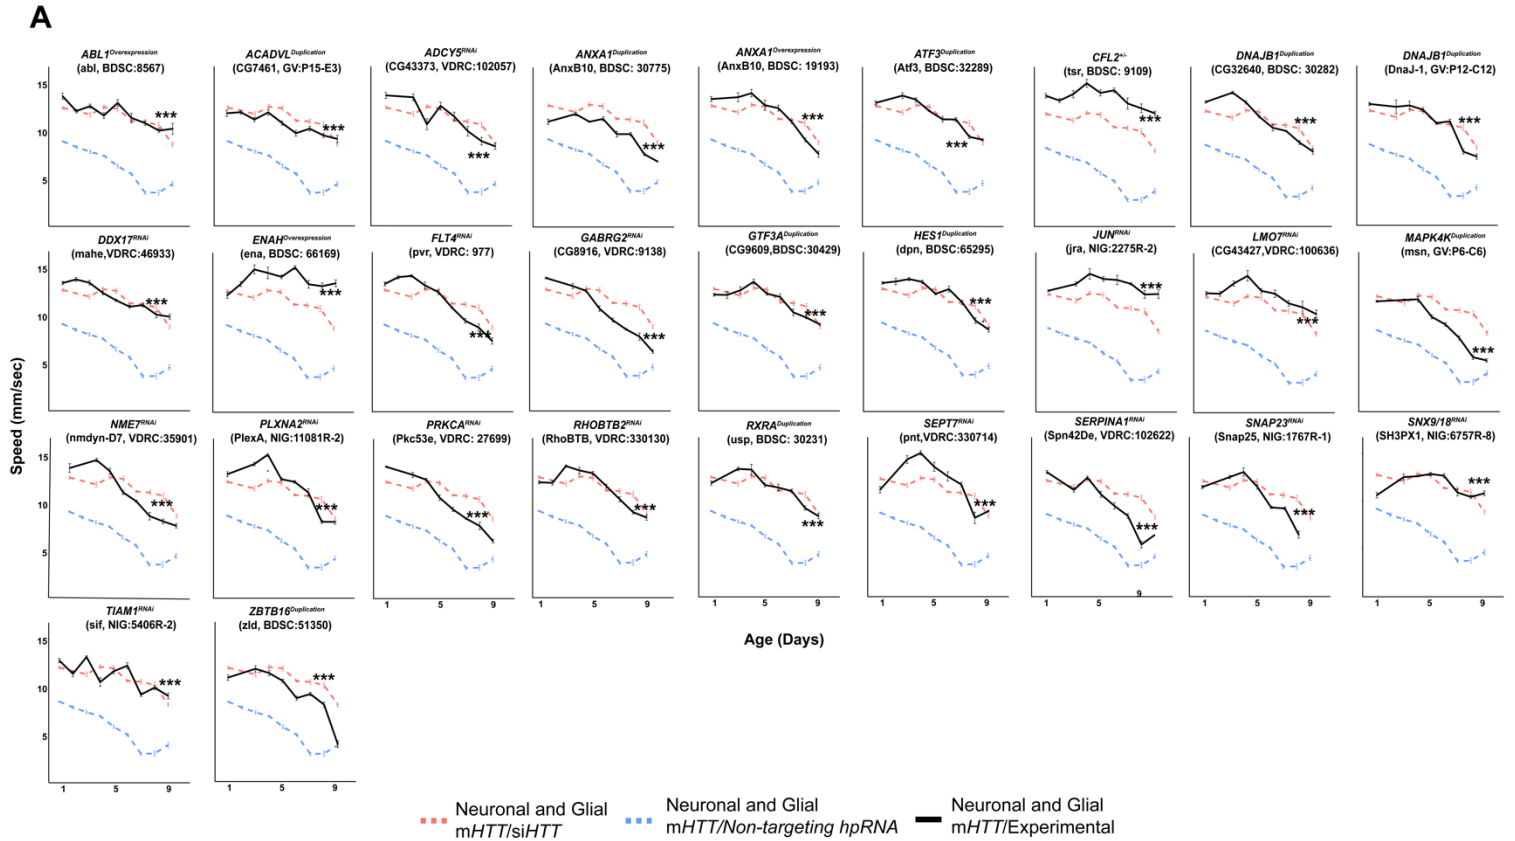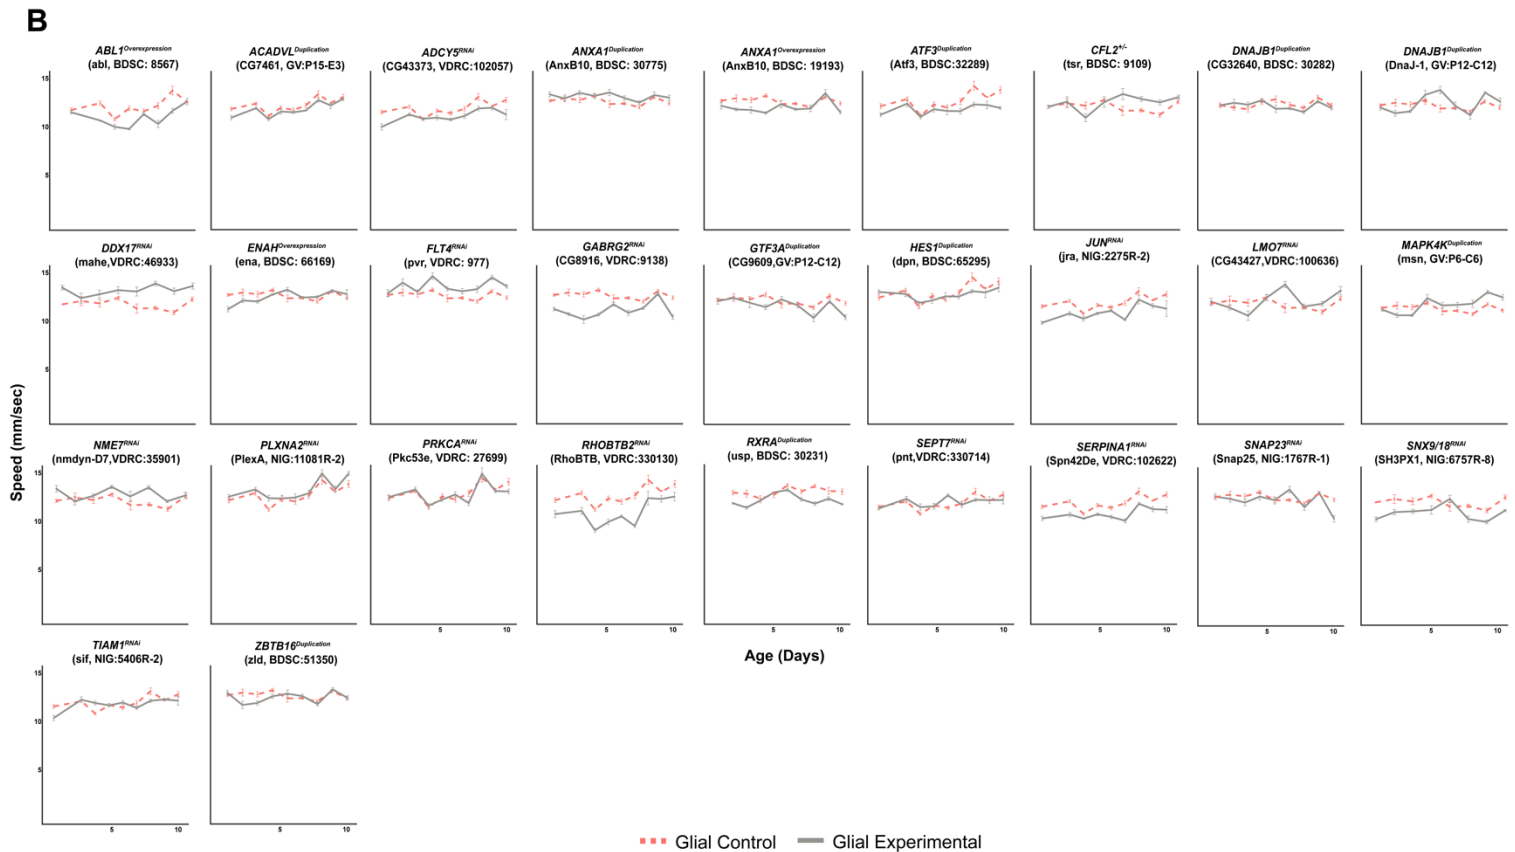

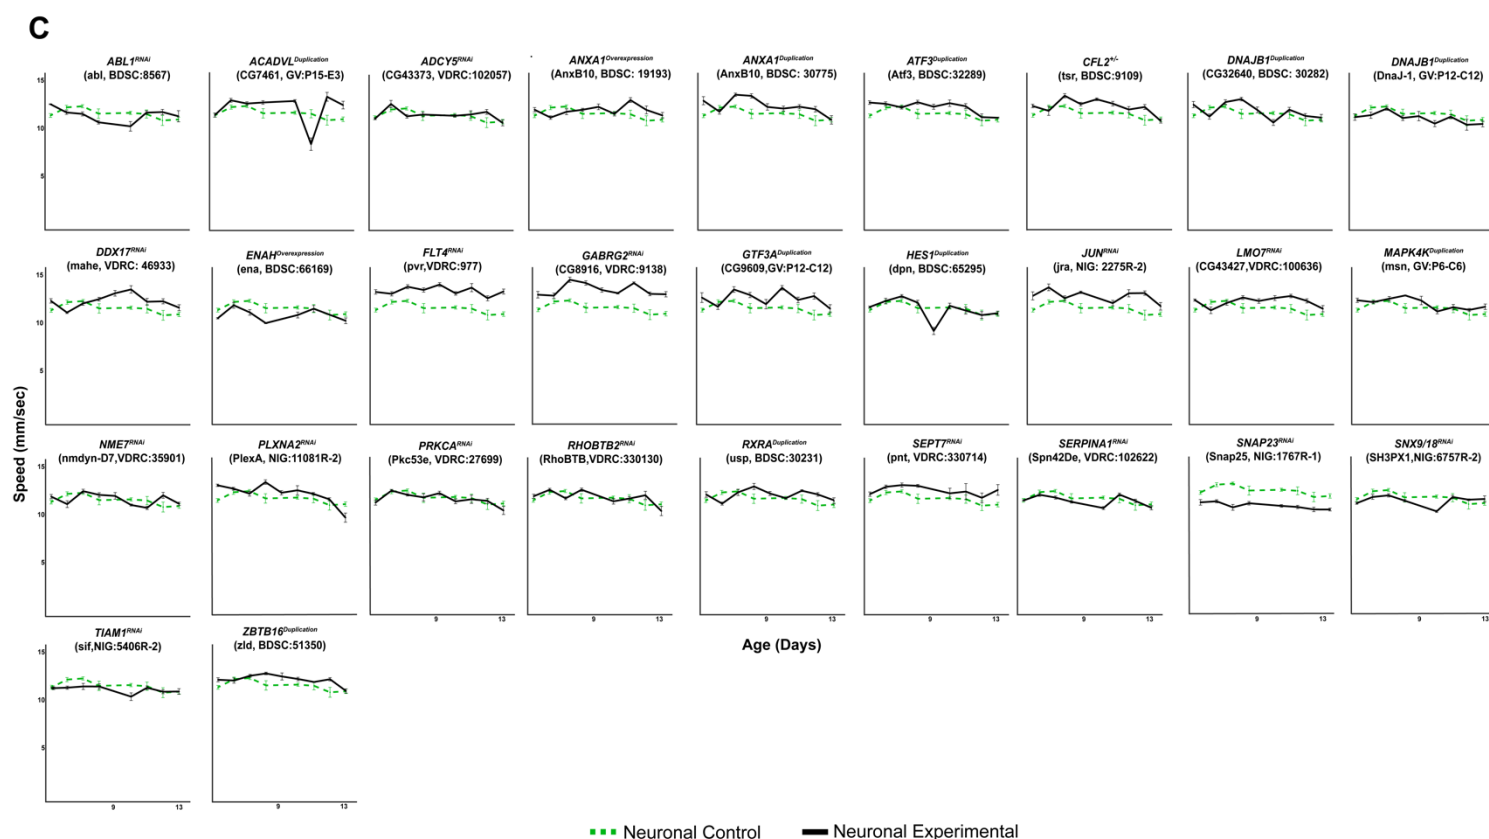

889 **Supplemental Figure 5. Genetic modifiers suppress behavioral impairments caused by *mHTT***

890 **expression in neurons and glia, Related to Figure 5.**

891 A) Representative graphs of the climbing speed of animals expressing mutant *HTT* in neurons and glia in  
 892 combination with common modifiers as a function of time. \*\*\*  $p < 0.001$  between the positive control  
 893 (dashed blue line) and experimental allele (solid black line) by linear mixed effects model and post-hoc,  
 894 pairwise analysis. Refer to **Supplemental Table 6** for full statistical analysis of each genotype in neurons,  
 895 glia, and both.

896 B) Representative graphs of the speed of wildtype *Drosophila* with the glial driver (*repo-GAL4*) and  
 897 alleles that suppressed mutant *HTT*-induced behavioral impairments in both neurons and glia. The dashed  
 898 red line represents the longitudinal climbing speed of animals expressing a non-targeting hpRNA in glia,  
 899 while the gray line represents climbing speed of animals expressing the common modifier allele in the  
 900 *repo-GAL4* background.

901 C) Representative graphs of the speed of wildtype *Drosophila* with the neuronal driver (*elav-GAL4*)  
 902 expressing the alleles that suppressed mutant *HTT*-induced behavioral impairments in both neurons and  
 903 glia as a function of time. The dashed green line represents the climbing speed of animals expressing a  
 904 non-targeting hpRNA in neurons, while the black line represents climbing speed of animals expressing  
 905 the common modifier allele in the *elav-GAL4* background.



906 **Supplemental Figure 5 continued.**

907 Points and error bars on the plot represent the mean speed  $\pm$ SEM of three replicates. Each genotype was  
908 tested with 4-6 replicates of 10 animals.

909 *Drosophila* Genotypes: Neuronal and glial mHTT positive control (*elav<sup>c155</sup>-GAL4/w<sup>1118</sup>;UAS-non-*  
910 *targeting hpRNA/+; repo-GAL4, UAS- HTT<sup>NT231Q128</sup>/+*), neuronal and glial mHTT treatment control  
911 (*elav<sup>c155</sup>-GAL4/w<sup>1118</sup>; repo-GAL4, UAS- HTT<sup>NT231Q128</sup>/UAS-siHTT*), neuronal and glial experimental  
912 (*elav<sup>c155</sup>-GAL4/w<sup>1118</sup>; repo-GAL4, UAS- HTT<sup>NT231Q128</sup>/modifier*), glial control (*elav<sup>c155</sup>-GAL4/w<sup>1118</sup>; UAS-*  
913 *non-targeting hpRNA/+*), glial experimental control (*elav<sup>c155</sup>-GAL4/w<sup>1118</sup>; modifier/+*), neuronal control  
914 (*w<sup>1118</sup>; UAS-non-targeting hpRNA/+; repo-GAL4/+*), and neuronal experimental control (*w<sup>1118</sup>; repo-*  
915 *GAL4/modifier*).

916

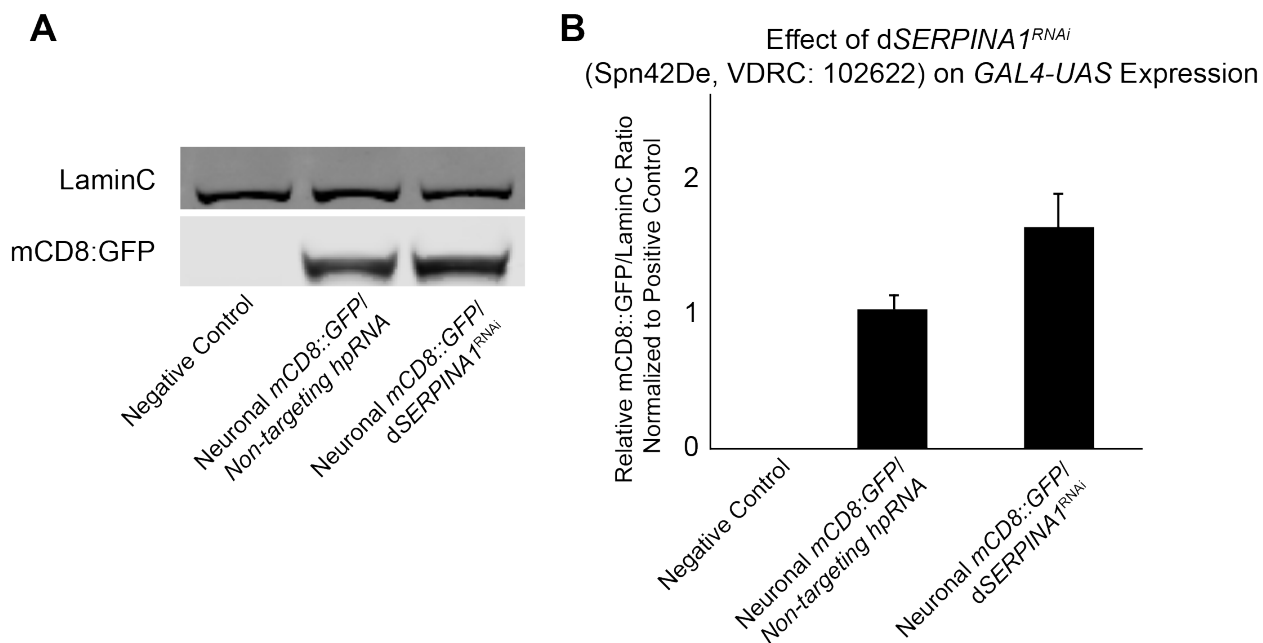

917

918 **Supplemental Figure 6. *dSERPINA1* knockdown does not reduce the expression of the *GAL4-UAS***  
919 **system, Related to Figure 6.**

920 A) Representative immunoblot performed on *Drosophila* protein lysates assessing mCD8::GFP protein  
921 levels as a proxy for *GAL4-UAS* expression. *mCD8::GFP* was expressed in neurons using the *elav-GAL4*  
922 driver. The negative control in this experiment was *elav>GAL4* driving the expression of a non-targeting  
923 hpRNA (left lane). The positive control was *elav>GAL4* expressing the *mCD8::GFP* construct and a non-  
924 targeting hpRNA (middle lane). The experimental was *elav>GAL4* driving the expression of the  
925 *mCD8::GFP* construct and the *dSERPINA1<sup>RNAi</sup>* (Spn42De, VDRC: 102622) allele that reduced mutant  
926 protein levels in **Figure 6** (right lane). LaminC was used as a loading control in this immunoblot.

927 B) Quantification of the three replicates from the immunoblot in (A) represented as the ratio of  
928 mCD8::GFP to LaminC, normalized to the average of the positive control.

929

930 **List of Supplemental Tables**

931

932 The following data sets (with the exception of Table S2 which can be found on page 33) are available at  
933 [http://bit.ly/Onur\\_et\\_al\\_supplement](http://bit.ly/Onur_et_al_supplement).

934

935 Table S1. Mappings of orthologous HD human, mouse, and *Drosophila* DEGs, Related to Figure 1.

936 Table S2. Network connectivity of DEGs responding to glial or neuronal *mHTT* expression, Related to  
937 Figure 2.

938 Table S3. Cluster membership and summary of cluster annotations for DEGs responding to glial or  
939 neuronal *mHTT* expression, Related to Figure 2.

940 Table S4. Summary of statistical analysis for alleles in the Synapse Assembly cluster that modify glial  
941 *mHTT*-induced behavioral impairments, Related to Figure 3.

942 Table S5. Summary of alleles screened and results for common modifiers of *mHTT*-induced behavioral  
943 impairments in neurons and glia, Related to Figure 5.

944 Table S6. Summary of statistics for alleles are common suppressors of neuronal and glial *mHTT*-induced  
945 behavioral impairments, Related to Figure 5.

946 **References**

- 947 Abu-Rumeileh, S., Halbgebauer, S., Steinacker, P., Anderl-Straub, S., Polisch, B., Ludolph, A.C.,  
948 Capellari, S., Parchi, P., and Otto, M. (2020). CSF SerpinA1 in Creutzfeldt-Jakob disease and  
949 frontotemporal lobar degeneration. *Ann. Clin. Transl. Neurol.* 7, 191–199.
- 950 Al-Dalahmah, O., Sosunov, A.A., Shaik, A., Ofori, K., Liu, Y., Vonsattel, J.P., Adorjan, I., Menon, V.,  
951 and Goldman, J.E. (2020). Single-nucleus RNA-seq identifies Huntington disease astrocyte states. *Acta*  
952 *Neuropathol. Commun.* 8, 19.
- 953 Al-Ramahi, I., Lu, B., Di Paola, S., Pang, K., de Haro, M., Peluso, I., Gallego-Flores, T., Malik, N.T.,  
954 Erikson, K., Bleiberg, B.A., et al. (2018). High-Throughput Functional Analysis Distinguishes  
955 Pathogenic, Nonpathogenic, and Compensatory Transcriptional Changes in Neurodegeneration. *Cell Syst.*  
956 7, 28-40.e4.
- 957 Barker, R.A., Fujimaki, M., Rogers, P., and Rubinsztein, D.C. (2020). Huntingtin-lowering strategies for  
958 Huntington's disease. *Expert Opin. Investig. Drugs* 1–8.
- 959 Barnat, M., Capizzi, M., Aparicio, E., Boluda, S., Wennagel, D., Kacher, R., Kassem, R., Lenoir, S.,  
960 Agasse, F., Braz, B.Y., et al. (2020). Huntington's disease alters human neurodevelopment. *Science* 369,  
961 787–793.
- 962 Bayraktar, O.A., Bartels, T., Holmqvist, S., Kleshchevnikov, V., Martirosyan, A., Polioudakis, D., Ben  
963 Haim, L., Young, A.M.H., Batiuk, M.Y., Prakash, K., et al. (2020). Astrocyte layers in the mammalian  
964 cerebral cortex revealed by a single-cell in situ transcriptomic map. *Nat. Neurosci.* 500–509.
- 965 Benraiss, A., Wang, S., Herrlinger, S., Li, X., Chandler-Militello, D., Mauceri, J., Burm, H.B., Toner, M.,  
966 Osipovitch, M., Jim Xu, Q., et al. (2016). Human glia can both induce and rescue aspects of disease  
967 phenotype in Huntington disease. *Nat. Commun.* 7.
- 968 Blake, J.A., Eppig, J.T., Kadin, J.A., Richardson, J.E., Smith, C.L., Bult, C.J., and  
969 the Mouse Genome Database Group (2017). Mouse Genome Database (MGD)-2017: community  
970 knowledge resource for the laboratory mouse. *Nucleic Acids Res.* 45, D723–D729.
- 971 Bondar, V.V., Adamski, C.J., Onur, T.S., Tan, Q., Wang, L., Diaz-Garcia, J., Park, J., Orr, H.T., Botas, J.,  
972 and Zoghbi, H.Y. (2018). PAK1 regulates ATXN1 levels providing an opportunity to modify its toxicity  
973 in spinocerebellar ataxia type 1. *Hum. Mol. Genet.* 27, 2863–2873.
- 974 Bradford, J., Shin, J.-Y., Roberts, M., Wang, C.-E., Li, X.-J., and Li, S. (2009). Expression of mutant  
975 huntingtin in mouse brain astrocytes causes age-dependent neurological symptoms. *Proc. Natl. Acad. Sci.*  
976 106, 22480–22485.
- 977 Buscemi, L., Ginet, V., Lopatar, J., Montana, V., Pucci, L., Spagnuolo, P., Zehnder, T., Grubišić, V.,  
978 Truttman, A., Sala, C., et al. (2017). Homer1 Scaffold Proteins Govern Ca<sup>2+</sup> Dynamics in Normal and  
979 Reactive Astrocytes. *Cereb. Cortex* 27, 2365–2384.
- 980 Cabezas-Llobet, N., Camprubí, S., García, B., Alberch, J., and Xifró, X. (2018). Human alpha 1-  
981 antitrypsin protects neurons and glial cells against oxygen and glucose deprivation through inhibition of  
982 interleukins expression. *Biochim. Biophys. Acta BBA - Gen. Subj.* 1862, 1852–1861.

- 983 Caron, N.S., Southwell, A.L., Brouwers, C.C., Cengio, L.D., Xie, Y., Black, H.F., Anderson, L.M., Ko,  
984 S., Zhu, X., van Deventer, S.J., et al. (2020). Potent and sustained huntingtin lowering via AAV5  
985 encoding miRNA preserves striatal volume and cognitive function in a humanized mouse model of  
986 Huntington disease. *Nucleic Acids Res.* *48*, 36–54.
- 987 Chung, H., Wangler, M.F., Marcogliese, P.C., Jo, J., Ravenscroft, T.A., Zuo, Z., Duraine, L.,  
988 Sadeghzadeh, S., Li-Kroeger, D., Schmidt, R.E., et al. (2020). Loss- or Gain-of-Function Mutations in  
989 ACOX1 Cause Axonal Loss via Different Mechanisms. *Neuron* *106*, 589-606.e6.
- 990 Csardi, G., and Nepusz, T. The igraph software package for complex network research.
- 991 Darmanis, S., Sloan, S.A., Zhang, Y., Enge, M., Caneda, C., Shuer, L.M., Hayden Gephart, M.G., Barres,  
992 B.A., and Quake, S.R. (2015). A survey of human brain transcriptome diversity at the single cell level.  
993 *Proc. Natl. Acad. Sci.* *112*, 7285–7290.
- 994 Diaz-Castro, B., Gangwani, M.R., Yu, X., Coppola, G., and Khakh, B.S. (2019). Astrocyte molecular  
995 signatures in Huntington’s disease. *Sci. Transl. Med.* *11*.
- 996 Dietzl, G., Chen, D., Schnorrer, F., Su, K.-C., Barinova, Y., Fellner, M., Gasser, B., Kinsey, K., Ooppel,  
997 S., Scheiblauer, S., et al. (2007). A genome-wide transgenic RNAi library for conditional gene  
998 inactivation in *Drosophila*. *Nature* *448*, 151–156.
- 999 Donnelly, K.M., DeLorenzo, O.R., Zaya, A.D., Pisano, G.E., Thu, W.M., Luo, L., Kopito, R.R., and  
1000 Panning Pearce, M.M. (2020). Phagocytic glia are obligatory intermediates in transmission of mutant  
1001 huntingtin aggregates across neuronal synapses. *ELife* *9*.
- 1002 Estrada Sánchez, A.M., Mejía-Toiber, J., and Massieu, L. (2008). Excitotoxic Neuronal Death and the  
1003 Pathogenesis of Huntington’s Disease. *Arch. Med. Res.* *39*, 265–276.
- 1004 Fernandez-Funez, P., Nino-Rosales, M.L., de Gouyon, B., She, W.C., Luchak, J.M., Martinez, P.,  
1005 Turiegano, E., Benito, J., Capovilla, M., Skinner, P.J., et al. (2000). Identification of genes that modify  
1006 ataxin-1-induced neurodegeneration. *Nature* *408*, 101–106.
- 1007 Ferrari Bardile, C., Garcia-Miralles, M., Caron, N.S., Rayan, N.A., Langley, S.R., Harmston, N.,  
1008 Rondelli, A.M., Teo, R.T.Y., Walzl, S., Anderson, L.M., et al. (2019). Intrinsic mutant HTT-mediated  
1009 defects in oligodendroglia cause myelination deficits and behavioral abnormalities in Huntington disease.  
1010 *Proc. Natl. Acad. Sci.* *116*, 9622–9627.
- 1011 Filimonenko, M., Isakson, P., Finley, K.D., Anderson, M., Jeong, H., Melia, T.J., Bartlett, B.J., Myers,  
1012 K.M., Birkeland, H.C.G., Lamark, T., et al. (2010). The selective macroautophagic degradation of  
1013 aggregated proteins requires the PI3P-binding protein Alfy. *Mol. Cell* *38*, 265–279.
- 1014 Filipello, F., Morini, R., Corradini, I., Zerbi, V., Canzi, A., Michalski, B., Erreni, M., Markicevic, M.,  
1015 Starvaggi-Cucuzza, C., Otero, K., et al. (2018). The Microglial Innate Immune Receptor TREM2 Is  
1016 Required for Synapse Elimination and Normal Brain Connectivity. *Immunity* *48*, 979-991.e8.
- 1017 Freeman, M.R., and Doherty, J. (2006). Glial cell biology in *Drosophila* and vertebrates. *Trends Neurosci.*  
1018 *29*, 82–90.

- 1019 Garcia, V.J., Rushton, D.J., Tom, C.M., Allen, N.D., Kemp, P.J., Svendsen, C.N., and Mattis, V.B.  
1020 (2019). Huntington's Disease Patient-Derived Astrocytes Display Electrophysiological Impairments and  
1021 Reduced Neuronal Support. *Front. Neurosci.* *13*.
- 1022 Gollin, P.A., Kalaria, R.N., Eikelenboom, P., Rozemuller, A., and Perry, G. (1992). Alpha 1-antitrypsin  
1023 and alpha 1-antichymotrypsin are in the lesions of Alzheimer's disease. *Neuroreport* *3*, 201–203.
- 1024 Goodman, L.D., Prudencio, M., Kramer, N.J., Martinez-Ramirez, L.F., Srinivasan, A.R., Lan, M., Parisi,  
1025 M.J., Zhu, Y., Chew, J., Cook, C.N., et al. (2019). Toxic expanded GGGGCC repeat transcription is  
1026 mediated by the PAF1 complex in C9orf72-associated FTD. *Nat. Neurosci.* *22*, 863–874.
- 1027 Hodges, A., Strand, A.D., Aragaki, A.K., Kuhn, A., Sengstag, T., Hughes, G., Elliston, L.A., Hartog, C.,  
1028 Goldstein, D.R., Thu, D., et al. (2006). Regional and cellular gene expression changes in human  
1029 Huntington's disease brain. *Hum. Mol. Genet.* *15*, 965–977.
- 1030 Hong, Y., Zhao, T., Li, X.-J., and Li, S. (2016). Mutant Huntingtin Impairs BDNF Release from  
1031 Astrocytes by Disrupting Conversion of Rab3a-GTP into Rab3a-GDP. *J. Neurosci.* *36*, 8790–8801.
- 1032 Hu, Y., Flockhart, I., Vinayagam, A., Bergwitz, C., Berger, B., Perrimon, N., and Mohr, S.E. (2011). An  
1033 integrative approach to ortholog prediction for disease-focused and other functional studies. *BMC*  
1034 *Bioinformatics* *12*, 357.
- 1035 Huang, B., Wei, W., Wang, G., Gaertig, M.A., Feng, Y., Wang, W., Li, X.-J., and Li, S. (2015). Mutant  
1036 Huntingtin Downregulates Myelin Regulatory Factor-Mediated Myelin Gene Expression and Affects  
1037 Mature Oligodendrocytes. *Neuron* *85*, 1212–1226.
- 1038 Jiang, R., Diaz-Castro, B., Looger, L.L., and Khakh, B.S. (2016). Dysfunctional Calcium and Glutamate  
1039 Signaling in Striatal Astrocytes from Huntington's Disease Model Mice. *J. Neurosci.* *36*, 3453–3470.
- 1040 Kaltenbach, L.S., Romero, E., Becklin, R.R., Chettier, R., Bell, R., Phansalkar, A., Strand, A., Torcassi,  
1041 C., Savage, J., Hurlburt, A., et al. (2007). Huntingtin Interacting Proteins Are Genetic Modifiers of  
1042 Neurodegeneration. *PLoS Genet.* *3*, e82.
- 1043 Kim, Y.J., Yi, Y., Sapp, E., Wang, Y., Cuiffo, B., Kegel, K.B., Qin, Z.-H., Aronin, N., and DiFiglia, M.  
1044 (2001). Caspase 3-cleaved N-terminal fragments of wild-type and mutant huntingtin are present in normal  
1045 and Huntington's disease brains, associate with membranes, and undergo calpain-dependent proteolysis.  
1046 *Proc. Natl. Acad. Sci.* *98*, 12784–12789.
- 1047 Langfelder, P., Cantele, J.P., Chatzopoulou, D., Wang, N., Gao, F., Al-Ramahi, I., Lu, X.-H., Ramos,  
1048 E.M., El-Zein, K., Zhao, Y., et al. (2016). Integrated genomics and proteomics define huntingtin CAG  
1049 length-dependent networks in mice. *Nat. Neurosci.* *19*, 623–633.
- 1050 Langmead, B., and Salzberg, S.L. (2012). Fast gapped-read alignment with Bowtie 2. *Nat. Methods* *9*,  
1051 357–359.
- 1052 Li, B., and Dewey, C.N. (2011). RSEM: accurate transcript quantification from RNA-Seq data with or  
1053 without a reference genome. *12*.
- 1054 Li, Z., Wang, C., Wang, Z., Zhu, C., Li, J., Sha, T., Ma, L., Gao, C., Yang, Y., Sun, Y., et al. (2019).  
1055 Allele-selective lowering of mutant HTT protein by HTT-LC3 linker compounds. *Nature* *575*, 203–209.

- 1056 Lian, H., Yang, L., Cole, A., Sun, L., Chiang, A.C.-A., Fowler, S.W., Shim, D.J., Rodriguez-Rivera, J.,  
1057 Tagliatalata, G., Jankowsky, J.L., et al. (2015). NF $\kappa$ B-Activated Astroglial Release of Complement C3  
1058 Compromises Neuronal Morphology and Function Associated with Alzheimer's Disease. *Neuron* 85,  
1059 101–115.
- 1060 Liddelow, S.A., Guttenplan, K.A., Clarke, L.E., Bennett, F.C., Bohlen, C.J., Schirmer, L., Bennett, M.L.,  
1061 Münch, A.E., Chung, W.-S., Peterson, T.C., et al. (2017). Neurotoxic reactive astrocytes are induced by  
1062 activated microglia. *Nature* 541, 481–487.
- 1063 Litvinchuk, A., Wan, Y.-W., Swartzlander, D.B., Chen, F., Cole, A., Propson, N.E., Wang, Q., Zhang, B.,  
1064 Liu, Z., and Zheng, H. (2018). Complement C3aR Inactivation Attenuates Tau Pathology and Reverses an  
1065 Immune Network Deregulated in Tauopathy Models and Alzheimer's Disease. *Neuron* 100, 1337-  
1066 1353.e5.
- 1067 Love, M.I., Huber, W., and Anders, S. (2014). Moderated estimation of fold change and dispersion for  
1068 RNA-seq data with DESeq2. *Genome Biol.* 15.
- 1069 McInnes, J., Wierda, K., Snellinx, A., Bounti, L., Wang, Y.-C., Stancu, I.-C., Apóstolo, N., Gevaert, K.,  
1070 Dewachter, I., Spires-Jones, T.L., et al. (2018). Synaptogyrin-3 Mediates Presynaptic Dysfunction  
1071 Induced by Tau. *Neuron* 97, 823-835.e8.
- 1072 McKinstry, S.U., Karadeniz, Y.B., Worthington, A.K., Hayrapetyan, V.Y., Ozlu, M.I., Serafin-Molina,  
1073 K., Risher, W.C., Ustunkaya, T., Dragatsis, I., Zeitlin, S., et al. (2014). Huntingtin is required for normal  
1074 excitatory synapse development in cortical and striatal circuits. *J. Neurosci. Off. J. Soc. Neurosci.* 34,  
1075 9455–9472.
- 1076 Miller, J.A., Menon, V., Goldy, J., Kaykas, A., Lee, C.-K., Smith, K.A., Shen, E.H., Phillips, J.W., Lein,  
1077 E.S., and Hawrylycz, M.J. (2014). Improving reliability and absolute quantification of human brain  
1078 microarray data by filtering and scaling probes using RNA-Seq. *BMC Genomics* 15, 154.
- 1079 Nakanishi, M., Nomura, J., Ji, X., Tamada, K., Arai, T., Takahashi, E., Bućan, M., and Takumi, T.  
1080 (2017). Functional significance of rare neuroligin 1 variants found in autism. *PLOS Genet.* 13, e1006940.
- 1081 Neueder, A., Landles, C., Ghosh, R., Howland, D., Myers, R.H., Faull, R.L.M., Tabrizi, S.J., and Bates,  
1082 G.P. (2017). The pathogenic exon 1 HTT protein is produced by incomplete splicing in Huntington's  
1083 disease patients. *Sci. Rep.* 7.
- 1084 Ochaba, J., Lukacsovich, T., Csikos, G., Zheng, S., Margulis, J., Salazar, L., Mao, K., Lau, A.L., Yeung,  
1085 S.Y., Humbert, S., et al. (2014). Potential function for the Huntingtin protein as a scaffold for selective  
1086 autophagy. *Proc. Natl. Acad. Sci.* 111, 16889–16894.
- 1087 Oceau, J.C., Chai, H., Jiang, R., Bonanno, S.L., Martin, K.C., and Khakh, B.S. (2018). An Optical  
1088 Neuron-Astrocyte Proximity Assay at Synaptic Distance Scales. *Neuron* 98, 49-66.e9.
- 1089 Olsen, A.L., and Feany, M.B. (2019). Glial  $\alpha$ -synuclein promotes neurodegeneration characterized by a  
1090 distinct transcriptional program in vivo. *Glia*.
- 1091 O'Rourke, J.G., Gareau, J.R., Ochaba, J., Song, W., Raskó, T., Reverter, D., Lee, J., Monteys, A.M.,  
1092 Pallos, J., Mee, L., et al. (2013). SUMO-2 and PIAS1 modulate insoluble mutant huntingtin protein  
1093 accumulation. *Cell Rep.* 4, 362–375.

- 1094 Osipovitch, M., Asenjo Martinez, A., Mariani, J.N., Cornwell, A., Dhaliwal, S., Zou, L., Chandler-  
1095 Militello, D., Wang, S., Li, X., Benraiss, S.-J., et al. (2019). Human ESC-Derived Chimeric Mouse  
1096 Models of Huntington's Disease Reveal Cell-Intrinsic Defects in Glial Progenitor Cell Differentiation.  
1097 *Cell Stem Cell* *24*, 107-122.e7.
- 1098 Paris Autism Research International Sibpair Study, Jamain, S., Quach, H., Betancur, C., Råstam, M.,  
1099 Colineaux, C., Gillberg, I.C., Soderstrom, H., Giros, B., Leboyer, M., et al. (2003). Mutations of the X-  
1100 linked genes encoding neuroligins NLGN3 and NLGN4 are associated with autism. *Nat. Genet.* *34*, 27–  
1101 29.
- 1102 Pearce, M.M.P., Spartz, E.J., Hong, W., Luo, L., and Kopito, R.R. (2015). Prion-like transmission of  
1103 neuronal huntingtin aggregates to phagocytic glia in the Drosophila brain. *Nat. Commun.* *6*.
- 1104 Peng, S., Xu, J., Pelkey, K.A., Chandra, G., Zhang, Z., Bagh, M.B., Yuan, X., Wu, L.-G., McBain, C.J.,  
1105 and Mukherjee, A.B. (2015). Suppression of agrin-22 production and synaptic dysfunction in *Cln1*<sup>-/-</sup>  
1106 mice. *Ann. Clin. Transl. Neurol.* *2*, 1085–1104.
- 1107 Phan, J.-A., Stockholm, K., Zareba-Paslawska, J., Jakobsen, S., Vang, K., Gjedde, A., Landau, A.M., and  
1108 Romero-Ramos, M. (2017). Early synaptic dysfunction induced by  $\alpha$ -synuclein in a rat model of  
1109 Parkinson's disease. *Sci. Rep.* *7*.
- 1110 Prots, I., Grosch, J., Brazdis, R.-M., Simmnacher, K., Veber, V., Havlicek, S., Hannappel, C., Krach, F.,  
1111 Krumbiegel, M., Schütz, O., et al. (2018).  $\alpha$ -Synuclein oligomers induce early axonal dysfunction in  
1112 human iPSC-based models of synucleinopathies. *Proc. Natl. Acad. Sci.* *115*, 7813–7818.
- 1113 Ring, K.L., An, M.C., Zhang, N., O'Brien, R.N., Ramos, E.M., Gao, F., Atwood, R., Bailus, B.J., Melov,  
1114 S., Mooney, S.D., et al. (2015). Genomic Analysis Reveals Disruption of Striatal Neuronal Development  
1115 and Therapeutic Targets in Human Huntington's Disease Neural Stem Cells. *Stem Cell Rep.* *5*, 1023–  
1116 1038.
- 1117 Romero, E., Cha, G.-H., Verstreken, P., Ly, C.V., Hughes, R.E., Bellen, H.J., and Botas, J. (2008).  
1118 Suppression of Neurodegeneration and Increased Neurotransmission Caused by Expanded Full-Length  
1119 Huntingtin Accumulating in the Cytoplasm. *Neuron* *57*, 27–40.
- 1120 Rosvall, M., and Bergstrom, C.T. (2007). An information-theoretic framework for resolving community  
1121 structure in complex networks. *Proc. Natl. Acad. Sci.* *104*, 7327–7331.
- 1122 Rosvall, M., and Bergstrom, C.T. (2008). Maps of random walks on complex networks reveal community  
1123 structure. *Proc. Natl. Acad. Sci.* *105*, 1118–1123.
- 1124 Rousseaux, M.W.C., Vázquez-Vélez, G.E., Al-Ramahi, I., Jeong, H.-H., Bajić, A., Revelli, J.-P., Ye, H.,  
1125 Phan, E.T., Deger, J.M., Perez, A.M., et al. (2018). A Druggable Genome Screen Identifies Modifiers of  
1126  $\alpha$ -Synuclein Levels via a Tiered Cross-Species Validation Approach. *J. Neurosci.* *38*, 9286–9301.
- 1127 Sathasivam, K., Neueder, A., Gipson, T.A., Landles, C., Benjamin, A.C., Bondulich, M.K., Smith, D.L.,  
1128 Faull, R.L.M., Roos, R.A.C., Howland, D., et al. (2013). Aberrant splicing of HTT generates the  
1129 pathogenic exon 1 protein in Huntington disease. *Proc. Natl. Acad. Sci.* *110*, 2366–2370.
- 1130 Saudou, F., and Humbert, S. (2016). The Biology of Huntingtin. *Neuron* *89*, 910–926.



- 1131 Sofroniew, M.V. (2009). Molecular dissection of reactive astrogliosis and glial scar formation. *Trends*  
1132 *Neurosci.* 32, 638–647.
- 1133 Spampinato, S.F., Copani, A., Nicoletti, F., Sortino, M.A., and Caraci, F. (2018). Metabotropic Glutamate  
1134 Receptors in Glial Cells: A New Potential Target for Neuroprotection? *Front. Mol. Neurosci.* 11.
- 1135 Starz-Gaiano, M., Cho, N.K., Forbes, A., and Lehmann, R. (2001). Spatially restricted activity of a  
1136 *Drosophila* lipid phosphatase guides migrating germ cells. *Dev. Camb. Engl.* 128, 983–991.
- 1137 Stogsdill, J.A., Ramirez, J., Liu, D., Kim, Y.H., Baldwin, K.T., Enustun, E., Ejikeme, T., Ji, R.-R., and  
1138 Eroglu, C. (2017). Astrocytic neuroligins control astrocyte morphogenesis and synaptogenesis. *Nature*  
1139 551, 192–197.
- 1140 Südhof, T.C. (2008). Neuroligins and neurexins link synaptic function to cognitive disease. *Nature* 455,  
1141 903–911.
- 1142 Szklarczyk, D., Franceschini, A., Wyder, S., Forslund, K., Heller, D., Huerta-Cepas, J., Simonovic, M.,  
1143 Roth, A., Santos, A., Tsafou, K.P., et al. (2015). STRING v10: protein–protein interaction networks,  
1144 integrated over the tree of life. *Nucleic Acids Res.* 43, D447–D452.
- 1145 Tabrizi, S.J., Leavitt, B.R., Landwehrmeyer, G.B., Wild, E.J., Saft, C., Barker, R.A., Blair, N.F.,  
1146 Craufurd, D., Priller, J., Rickards, H., et al. (2019). Targeting Huntingtin Expression in Patients with  
1147 Huntington’s Disease. *N. Engl. J. Med.* 380, 2307–2316.
- 1148 Tereshchenko, A.V., Schultz, J.L., Bruss, J.E., Magnotta, V.A., Epping, E.A., and Nopoulos, P.C. (2020).  
1149 Abnormal development of cerebellar-striatal circuitry in Huntington disease. *Neurology* 94, e1908–  
1150 e1915.
- 1151 The Huntington’s Disease Collaborative Research Group (1993). A novel gene containing a trinucleotide  
1152 repeat that is expanded and unstable on Huntington’s disease chromosomes. The Huntington’s Disease  
1153 Collaborative Research Group. *Cell* 72, 971–983.
- 1154 Tong, X., Ao, Y., Faas, G.C., Nwaobi, S.E., Xu, J., Hausteiner, M.D., Anderson, M.A., Mody, I., Olsen,  
1155 M.L., Sofroniew, M.V., et al. (2014). Astrocyte Kir4.1 ion channel deficits contribute to neuronal  
1156 dysfunction in Huntington’s disease model mice. *Nat. Neurosci.* 17, 694–703.
- 1157 Trajkovic, K., Jeong, H., and Krainc, D. (2017). Mutant Huntingtin Is Secreted via a Late  
1158 Endosomal/Lysosomal Unconventional Secretory Pathway. *J. Neurosci.* 37, 9000–9012.
- 1159 Trotter, J.H., Dargaie, Z., Wöhr, M., Liakath-Ali, K., Raju, K., Essayan-Perez, S., Nabet, A., Liu, X., and  
1160 Südhof, T.C. (2020). Astrocytic Neurexin-1 Orchestrates Functional Synapse Assembly (bioRxiv).
- 1161 Ushkaryov, Y., Petrenko, A., Geppert, M., and Südhof, T. (1992). Neurexins: synaptic cell surface  
1162 proteins related to the alpha-latrotoxin receptor and laminin. *Science* 257, 50–56.
- 1163 Vaags, A.K., Lionel, A.C., Sato, D., Goodenberger, M., Stein, Q.P., Curran, S., Ogilvie, C., Ahn, J.W.,  
1164 Drmic, I., Senman, L., et al. (2012). Rare Deletions at the Neurexin 3 Locus in Autism Spectrum  
1165 Disorder. *Am. J. Hum. Genet.* 90, 133–141.
- 1166 Vonsattel, J.P., Myers, R.H., Stevens, T.J., Ferrante, R.J., Bird, E.D., and Richardson, E.P. (1985).  
1167 Neuropathological classification of Huntington’s disease. *J. Neuropathol. Exp. Neurol.* 44, 559–577.

- 1168 Wang, J., Gong, J., Li, L., Chen, Y., Liu, L., Gu, H., Luo, X., Hou, F., Zhang, J., and Song, R. (2018).  
1169 Neurexin gene family variants as risk factors for autism spectrum disorder: Genetic risk for autism  
1170 spectrum disorder. *Autism Res.* *11*, 37–43.
- 1171 Wang, N., Gray, M., Lu, X.-H., Cantle, J.P., Holley, S.M., Greiner, E., Gu, X., Shirasaki, D., Cepeda, C.,  
1172 Li, Y., et al. (2014). Neuronal targets for reducing mutant huntingtin expression to ameliorate disease in a  
1173 mouse model of Huntington’s disease. *Nat. Med.* *20*, 536–541.
- 1174 Weiss, S., Melom, J.E., Ormerod, K.G., Zhang, Y.V., and Littleton, J.T. (2019). Glial Ca<sup>2+</sup> signaling links  
1175 endocytosis to K<sup>+</sup> buffering around neuronal somas to regulate excitability. *ELife* *8*.
- 1176 Wellington, C.L., Ellerby, L.M., Gutekunst, C.-A., Rogers, D., Warby, S., Graham, R.K., Loubser, O.,  
1177 van Raamsdonk, J., Singaraja, R., Yang, Y.-Z., et al. (2002). Caspase cleavage of mutant huntingtin  
1178 precedes neurodegeneration in Huntington’s disease. *J. Neurosci. Off. J. Soc. Neurosci.* *22*, 7862–7872.
- 1179 Windrem, M.S., Osipovitch, M., Liu, Z., Bates, J., Chandler-Militello, D., Zou, L., Munir, J., Schanz, S.,  
1180 McCoy, K., Miller, R.H., et al. (2017). Human iPSC Glial Mouse Chimeras Reveal Glial Contributions to  
1181 Schizophrenia. *Cell Stem Cell* *21*, 195-208.e6.
- 1182 Wood, T.E., Barry, J., Yang, Z., Cepeda, C., Levine, M.S., and Gray, M. (2018). Mutant huntingtin  
1183 reduction in astrocytes slows disease progression in the bachd conditional huntington’s disease mouse  
1184 model. *Hum. Mol. Genet.* *28*, 487–500.
- 1185 Yamamoto, A., Lucas, J.J., and Hen, R. (2000). Reversal of neuropathology and motor dysfunction in a  
1186 conditional model of Huntington’s disease. *Cell* *101*, 57–66.
- 1187 Yao, Y., Cui, X., Al-Ramahi, I., Sun, X., Li, B., Hou, J., Difiglia, M., Palacino, J., Wu, Z.-Y., Ma, L., et  
1188 al. (2015). A striatal-enriched intronic GPCR modulates huntingtin levels and toxicity. *ELife* *4*.
- 1189 Yaylaoglu, M.B., Titmus, A., Visel, A., Alvarez-Bolado, G., Thaller, C., and Eichele, G. (2005).  
1190 Comprehensive expression atlas of fibroblast growth factors and their receptors generated by a novel  
1191 robotic in situ hybridization platform. *Dev. Dyn.* *234*, 371–386.
- 1192 Yuva-Aydemir, Y., Almeida, S., and Gao, F.-B. (2018). Insights into C9ORF72-Related ALS/FTD from  
1193 *Drosophila* and iPSC Models. *Trends Neurosci.* *41*, 457–469.
- 1194 Zeng, X., Sun, M., Liu, L., Chen, F., Wei, L., and Xie, W. (2007). Neurexin-1 is required for synapse  
1195 formation and larvae associative learning in *Drosophila*. *FEBS Lett.* *581*, 2509–2516.
- 1196 Ziegenfuss, J.S., Doherty, J., and Freeman, M.R. (2012). Distinct molecular pathways mediate glial  
1197 activation and engulfment of axonal debris after axotomy. *Nat. Neurosci.* *15*, 979–987.
- 1198
